1 **PIN FORMED 2 facilitates the transport of Arsenite in *Arabidopsis thaliana***

2 Mohammad Arif Ashraf<sup>1\*</sup>, Kana Umetsu<sup>2\*</sup>, Olena Ponomarenko<sup>\*3</sup>, Michiko Saito<sup>2</sup>, Mohammad  
3 Aslam<sup>2</sup>, Olga Antipova<sup>4</sup>, Natalia Dolgova<sup>3</sup>, Cheyenne D. Kiani<sup>3¶</sup>, Susan Nezhati<sup>3</sup>, Keitaro Tanoi<sup>5</sup>,  
4 Katsuyuki Minegishi<sup>6</sup>, Kotaro Nagatsu<sup>6</sup>, Takehiro Kamiya<sup>7</sup>, Toru Fujiwara<sup>7</sup>, Christian Luschnig<sup>8</sup>  
5 Karen Tanino<sup>9</sup>, Ingrid Pickering<sup>3</sup>, Graham N. George<sup>3</sup>, and Abidur Rahman<sup>1,2,10,11</sup>

6

7 <sup>1</sup>United Graduate School of Agricultural Sciences, Iwate University, Morioka, Iwate Japan

8 <sup>2</sup>Department of Plant Bio Sciences, Faculty of Agriculture, Iwate University, Morioka Iwate,  
9 Japan

10 <sup>3</sup>Molecular and Environmental Science Research Group, Department of Geological Sciences,  
11 University of Saskatchewan, Saskatoon, Saskatchewan, Canada

12 <sup>4</sup>Argonne National Lab, Advanced Photon Source, XSD-MIC, Argonne, USA

13 <sup>5</sup>Isotope Facility for Agricultural Education and Research, Graduate School of Agricultural and  
14 Life Sciences, The University of Tokyo, Bunkyo-ku, Tokyo, Japan

15 <sup>6</sup>Department of Radiopharmaceuticals Development, National Institute of Radiological Sciences,  
16 National Institutes for Quantum and Radiological Science and Technology, Inage, Chiba, Japan

17 <sup>7</sup>Department of Applied Biological Chemistry, Graduate School of Agricultural and Life  
18 Sciences, The University of Tokyo, Bunkyo-ku, Tokyo, Japan

19 <sup>8</sup>Department of Applied Genetics and Cell Biology, University of Natural Resources and Life  
20 Sciences, Vienna (BOKU), Muthgasse 18, 1180, Wien, Austria

21 <sup>9</sup>Department of Plant Sciences, College of Agriculture and Bioresources, University of  
22 Saskatchewan, Saskatoon, Canada

23 <sup>10</sup>Agri-Innovation Center, Iwate University, Morioka, Iwate, Japan

24 <sup>11</sup>To whom correspondence should be addressed: Email: [abidur@iwate-u.ac.jp](mailto:abidur@iwate-u.ac.jp)

25 \* These authors contributed equally

26

27 ¶ Present address: Biological Sciences, 507 Campus Drive N.W., University of Calgary, 2500  
28 University Drive NW, Calgary, AB, Canada, T2N 1N4

29

30

31 Running title: PIN2, a putative As(III) transporter

32

33 Key words: auxin, arsenite, PIN2, trafficking, transport

34 **Abstract**

35           Arsenic contamination is a major environmental issue as it may lead to serious health  
36 hazard. Reduced trivalent form of inorganic arsenic, arsenite, is in general more toxic to plants  
37 compared with the fully oxidized pentavalent arsenate. The uptake of arsenite in plants has been  
38 shown to be mediated through a large subfamily of plant aquaglyceroporins, nodulin 26-like  
39 intrinsic proteins (NIPs). However, the efflux mechanisms, as well as the mechanism of arsenite-  
40 induced root growth inhibition, remain poorly understood. Using molecular physiology,  
41 synchrotron imaging, and root transport assay approaches, we show that the cellular transport of  
42 trivalent arsenicals in *Arabidopsis thaliana* is strongly modulated by PIN FORMED 2 (PIN2)  
43 auxin efflux transporter. Direct transport assay using radioactive arsenite, X-ray fluorescence  
44 imaging coupled with X-ray absorption spectroscopy, and ICP-MS analysis revealed that  
45 *pin2/eir1-1* plants accumulate higher concentrations of arsenite in root compared to wild-type. At  
46 the cellular level, arsenite specifically targets intracellular cycling of PIN2 and thereby alters the  
47 cellular auxin homeostasis. Consistently, loss of PIN2 results in arsenite hypersensitivity in root.  
48 Collectively, these results demonstrate that PIN2 plays an important role in regulating cellular  
49 efflux of trivalent arsenical species and, possibly may serve as a putative transporter of arsenite  
50 metabolites *in planta*.

51

## 52 **Introduction**

53 It is estimated that more than 140 million people worldwide are affected by the elevated  
54 levels of arsenic (As) in drinking water (WHO 2018). Plants readily accumulate arsenic from  
55 contaminated soils and irrigation water, resulting in arsenic exposure to population, especially in  
56 arsenicosis-affected areas where irrigated crops are the main staple of the diet (Meharg and Zhao,  
57 2012). Breeding of resistant crop varieties with low accumulation of arsenic requires  
58 understanding of complex molecular interactions involved in arsenic uptake, biotransformation,  
59 compartmentalisation, and extrusion mechanisms in plants.

60 Arsenic has a range of oxidation states from -3 to +5 and forms a large variety of organic  
61 and inorganic compounds. In natural aquifers, arsenic oxyanions, pentavalent arsenates  $iAs(V)$   
62 and reduced trivalent arsenites  $iAs(III)$ , are predominant inorganic species in aerobic and  
63 anaerobic environments, respectively. Trivalent arsenicals are regarded to be more toxic  
64 compared to their pentavalent analogues as reviewed in. The toxicity of trivalent arsenicals is  
65 connected to their propensity of binding to sulfhydryl groups of proteins resulting in disruption  
66 of redox processes and the metabolism of a cell as a whole. In a broad range of pH ( $pK_a=9.2$ ),  
67 solvated  $iAs(III)$  species is present as uncharged non-dissociated  $As(OH)_3$  polyol molecule,  
68 which structurally and chemically resembles glycerol (Ravenscroft et al., 2009; Yang et al.,  
69 2012). Like microorganisms and mammalian cells, higher plants also use aquaglyceroporin  
70 proteins to facilitate arsenite entry in plant root cells. It was shown that three of the five plant  
71 aquaporin subfamilies, such as nodulin 26-like intrinsic proteins (NIP), plasma membrane (PIP)  
72 and tonoplast intrinsic proteins (TIP) are involved in the uptake and translocation of  $iAs(III)$   
73 species and methylated organic arsenic metabolites, in plant cells and tonoplasts, respectively.  
74 Many of aquaporins demonstrate bidirectional transport properties for arsenic species, so their  
75 action can result in efflux of the arsenic to environment (Maciaszczyk-Dziubinska et al., 2012;  
76 Xu et al., 2015).

77 In aerobic conditions, the plant phosphate transporters are the main channel of inorganic  
78  $As(V)$  species' uptake into the cell, where they interfere with processes of oxidative  
79 phosphorylation (Shen et al., 2013; Latowski et al., 2018). Inside the plant cell,  $As(V)$  is readily  
80 reduced to  $As(III)$  species with the help of arsenate reductases, of ACR2 and HAC1 (Ellis et al.,  
81 2006; Salt, 2017). As-hyperaccumulating ferns from the *Pteris* genus make use of ACR3-like

82 transporters, absent in angiosperms, to accumulate inorganic arsenite in vacuoles of shoot tissues  
83 and gametophytes, possibly as a defence against herbivores (Indriolo et al., 2010). In  
84 angiosperms, however, one of the main detoxification mechanisms is formation of As(III)  
85 complexes with sulfhydryl (–SH) groups in glutathione and cysteine-rich polypeptides, plant  
86 phytochelatin (PCs) and metallothioneins, which are sequestered in the vacuoles with the help  
87 of ABC transporters (Shen et al., 2013; Pickering et al., 2000; Song et al., 2014). Reduction of  
88 As(V) to As(III) was also shown to facilitate excretion of arsenicals back to external medium. It  
89 has been found that non-hyperaccumulating species store a majority of As(III)-thiolated species  
90 in root vacuoles, however, root-to-shoot transportation of arsenicals is found in all species  
91 (Latowski et al., 2018).

92 Arsenite loading and transport into root vascular system are found to be modulated by  
93 several transporters. In Arabidopsis, AtNIP1;1 and AtNIP3;1, and in rice, OsNIP2;1 (Lsi1) have  
94 been characterized as major arsenite uptake carriers (Ma et al., 2008; Kamiya et al., 2009; Xu et  
95 al., 2015). The efflux of arsenite from the exodermis and endodermis cells to xylem in rice root  
96 is suggested to be largely regulated by a silicon efflux carrier Lsi2 (Ma et al., 2008). Recently,  
97 involvement of auxin transporter, AUX1 in arsenite response has been shown. The plant  
98 tolerance to arsenite is linked to AUX1 mediated auxin transport and reactive oxygen species  
99 (ROS)-mediated signaling (Krishnamurthy and Rathinasabapathi, 2013). However, the role of  
100 auxin transporters in arsenite transport was not investigated.

101 The family of PIN-FORMED (PINs) are the major transporters that facilitates the cellular  
102 auxin redistribution and homeostasis that directly affects plant growth and development under  
103 both optimal and stressed conditions (Okada et al., 1991; Luschnig et al., 1998; Shibasaki et al.,  
104 2009; Hanzawa et al., 2013; Wu et al., 2015; Ashraf and Rahman, 2019). The analysis of  
105 structure and function of PINs' family of auxin efflux carriers places them as a part of  
106 bile/arsenite/riboflavin transporter (BART) superfamily of secondary transporters and signalling  
107 proteins (<http://www.tcdb.org/search/result.php?tc=2.A.69#ref9696>, (Mansour et al., 2007). Notably,  
108 members of BART include Arc3 family of arsenical resistance bacterial proteins transporting  
109 As(III) and Sb(III) (Maciaszczyk-Dziubinska et al., 2012).

110 Many proteins are not confined to only one function. For example, the LSi2, plasma  
111 membrane silicic acid efflux pump, is also a member of Arsenite-Antimonite (ArsB) efflux

112 family, and serves as an arsenite efflux transporter in plants (Ma et al., 2008). With that, LSi2  
113 shows 18% identity to the to the *Escherichia Coli* (*E.coli*) efflux transporter ArsB (Ma et al.,  
114 2008). Although these two transporters from two different species show very low identity, at  
115 cellular level they execute a similar function raising the possibility that other plant transporters  
116 homologous to ArsB may show a similar functionality. In fact, it was previously reported that  
117 portions of auxin efflux facilitator (EIR1)/PIN FORMED 2 (PIN2) show 35-40% similarity to  
118 *E.coli* efflux carrier ArsB, and to SbmA, an *E.coli* integral membrane protein, which is required  
119 for the uptake of the antibiotic Microcin 25 (Luschnig et al., 1998).

120 Although PIN2 shows a higher homology to ArsB compared to Lsi2, no effort has been  
121 made to characterize whether PIN2 plays any functional role in arsenite transport. Using  
122 physiology, molecular and cell biology, high resolution synchrotron imaging, and direct transport  
123 assay approaches, we tried to decipher the role of PINs in regulating arsenic response. Our  
124 results demonstrate that 1) arsenite, but not the arsenate response in Arabidopsis root is regulated  
125 by PIN2; 2) arsenite alters the intracellular auxin homeostasis through selective modulation of  
126 PIN2 trafficking, and 3) PIN2 facilitates the transport of trivalent arsenical species and possibly  
127 functions as a putative efflux transporter for arsenite metabolites *in planta*.

## 128 **Results**

### 129 **Homology of plant auxin efflux carriers and selected arsenite transporters**

130 Previously it was reported that portions of PIN2 show 35% - 40% identity to the bacterial  
131 transporter ArsB (Luschnig et al., 1998). We reassessed the homology of PIN proteins with  
132 different arsenite transporters using a bioinformatics approach. Plasma membrane localized PIN  
133 proteins, which function as intracellular auxin efflux carriers, all have a similar structure, with  
134 two hydrophobic domains, consisting of about 5 transmembrane helices each, separated by a  
135 central intracellular hydrophilic domain. Among the 8 annotated PIN proteins in Arabidopsis,  
136 PIN1, PIN2, PIN3, PIN4, and PIN7 reside in the plasma membrane, while PIN5 and PIN8 are  
137 localized in the endoplasmic reticulum (ER). Recent research showed a complex behavior and  
138 localization of PIN6 both in ER and plasma membrane (Simon et al., 2016).

139 The cladogram of the plasma membrane localized PIN proteins places PIN1 and PIN2  
140 in one clade, and PIN3, PIN4 and PIN7 in another clade, where PIN3 and PIN7 are closely

141 associated because of their high homology (Supplemental Figure 1). In general, the homology  
142 among plasma membrane residing PIN proteins ranges from 60% to 90% (Supplemental Figure  
143 2; Supplemental Table 1). Multiple sequence alignments of PIN1, PIN2 and PIN3 proteins  
144 against various arsenite transporters revealed that they show approximately 25% homology with  
145 bacterial transporter ArsB, but lower homology with Lsi2 (Table 1; Supplemental Figure 3 and  
146 2). AtPINs also showed 18% homology to arsenite transporters Acr3 from yeast *S.*  
147 *cerevisiae* (Ghosh et al., 2002), and arsenic hyperaccumulator fern *Pteris vittata*<sup>11</sup>. Compared  
148 with Lsi2, AtPINs show higher homology to all the known arsenite transporters (Table 1,  
149 Supplemental Table 3).

### 150 **Loss of PIN2 results in altered response to arsenite**

151 To understand the functional significance of AtPINs homology to bacterial arsenite  
152 transporter ArsB, we next investigated the response of selected PIN1, PIN2, PIN3 and PIN4  
153 mutants to both arsenite and arsenate. Root elongation in *A. thaliana* shows a strong response to  
154 exogenous arsenite and arsenate, albeit at different concentrations. Time course and dose  
155 response assays of root growth in wildtype revealed that approximately 50% inhibition of root  
156 elongation can be achieved with 10 $\mu$ M arsenite over 3 days incubation (Figures 1A and 1B).  
157 Consistent with previous results (Lee et al., 2003), a much higher concentration of arsenate  
158 (1.5mM) was required to achieve similar degree of root elongation inhibition, see Supplemental  
159 Figure 4.

160 In a previous report, it was claimed that both *pin2* and *pin1* mutants were hypersensitive  
161 to arsenite-induced root growth inhibition (Krishnamurthy and Rathinasabapathi, 2013).  
162 However, in our screening, *pin1*, *pin3* and *pin4* mutants showed a wild-type response to arsenite  
163 exposure (Figures 1C and 1D).

164 Among the membrane residing PIN mutants that we tested for root growth assay, the  
165 response of *pin2/eir1-1* to arsenite exposure was the most striking. At all tested concentrations of  
166 arsenite, *eir1-1* roots showed hypersensitive response to arsenite-induced inhibition of root  
167 elongation. Additionally, the *eir1-1* roots exhibited hook-like curling in presence of arsenite  
168 (Figures 1C and 1D). Complementation of *pin2* mutation with genomic PIN2 reverted back both  
169 the curling root phenotype and hypersensitive root growth response, confirming that the

170 observed altered response of *pin2/eir1-1* mutant towards arsenite is linked to PIN2 (Figures 1C  
171 and 1D). In contrast, all these mutants showed wild-type like response to arsenate-induced root  
172 growth inhibition (Supplemental Figure 4). Collectively, these results strongly suggest that PIN2  
173 is a potential regulator of arsenite response in roots.

#### 174 **Arsenite alters auxin response in Arabidopsis root through modulating auxin transport**

175 PIN2 is functional for auxin efflux in the lateral root cap (LRC), epidermal and cortex  
176 cells, and through its intracellular polarity it maintains a maximal auxin gradient at the root tip,  
177 which is an absolute requirement for root gravity response (Rahman et al., 2010). Consistently,  
178 loss of PIN2 results in complete agravitropic response in roots (Luschnig et al., 1998). Since  
179 *pin2/eir1-1* mutant showed altered response to arsenite, we hypothesized that arsenite may affect  
180 the root auxin response. To clarify this possibility, we investigated the effect of arsenite on the  
181 root gravity response in wild type roots. Arsenite considerably slows down the gravity response  
182 of the wild type roots. However, effect of arsenite on wild type root elongation was statistically  
183 insignificant during the gravity response assay period (Figures 2A and 2B), confirming that the  
184 arsenite-induced inhibition of gravity response is unlinked to the inhibition of root elongation.

185 The root gravity response is regulated by the asymmetric distribution of auxin, which is  
186 largely dependent on the auxin effluxed by PIN2 (Luschnig et al., 1998; Rahman et al., 2010).  
187 To understand whether the cellular auxin homeostasis in the root meristem is altered by arsenite,  
188 we monitored the intracellular auxin response using two auxin responsive markers *IAA2-GUS*  
189 and *DII-VENUS* both of which are capable of detecting intracellular auxin distribution at high  
190 spatio-temporal resolution (Luschnig et al., 1998; Shibasaki et al., 2009; Hanzawa et al., 2013;  
191 Band et al., 2012; Brunoud et al., 2012). Only a brief incubation in arsenite altered the auxin  
192 response pattern in root meristem. More GUS staining was observed in arsenite treated roots  
193 compared with wild-type, and the response was proportional to the incubation time (Figures 2C  
194 and 2D). Similar results were observed with *DII-Venus* marker line for long term arsenite  
195 treatment (Supplemental Figure 5). Interestingly, after 2 h incubation in arsenite, GUS signal  
196 started to accumulate in the peripheral cells like epidermis and cortex which typically results  
197 from inhibition of auxin transport (Figure 2C, Shibasaki et al., 2009), indicating that arsenite  
198 may inhibit auxin transport. Shootward auxin transport (which is largely regulated by PIN2)

199 assay with  $3^H$  IAA revealed that arsenite indeed inhibits the shootward auxin transport (Figure  
200 2E).

201 These results suggest that in addition to other systemic effects likely exhibited by  
202 trivalent arsenicals in living cells (Shen et al., 2013), arsenite-modulated PIN2 activity resulted  
203 in the altered cellular auxin response and reduced auxin transport.

#### 204 **Arsenite alters intracellular trafficking of PIN2**

205 To provide a mechanistic explanation of arsenite effect on PIN2, we next investigated  
206 expression of PIN2 both at transcriptional and translational levels. The transcript analyses of  
207 PIN2 by quantitative real time PCR revealed no significant difference in transcript level under  
208 arsenite treatment, suggesting that PIN2 is not under direct transcriptional regulation of arsenite  
209 (Supplemental Figure 6). Earlier it has been demonstrated that for proper functioning of PIN2 as  
210 an IAA efflux protein, both the polar deployment and intracellular trafficking of PIN2 are  
211 required (Luschnig et al., 1998; Shibasaki et al., 2009; Hanzawa et al., 2013; Laxmi et al., 2008;  
212 Wan et al., 2012). Moreover, this trafficking process has also been shown to be sensitive to  
213 various kinds of stresses (Luschnig et al., 1998; Shibasaki et al., 2009; Hanzawa et al., 2013;  
214 Laxmi et al., 2008; Wan et al., 2012). Cellular localization of PIN2, using PIN2-green  
215 fluorescent protein (GFP) transgenic seedlings (Xu and Scheres, 2005) revealed that arsenite did  
216 not alter the asymmetric localization of PIN2 (Figure 3A, upper panel) but did suppress the  
217 trafficking (Figure 3B). In control wild type plants, protein trafficking inhibitor brefeldin A  
218 (BFA) resulted in formation of large number of PIN2-positive small bodies in cytosol,  
219 supporting the notion of continuous cycling of PIN2 between plasma membrane and endosomal  
220 compartments (Figure 3A; Supplemental Figure 7). Importantly, in both short (2h) and long term  
221 (3d) arsenite treatments, formation of these small PIN2-positive bodies was drastically reduced  
222 (Figures 3A and 3B; Supplemental Figures 7A and 7B).

223 To elucidate the specificity of arsenite-induced inhibition of PIN2 trafficking, we  
224 investigated its effect on the trafficking of PIN1, a close homologue of PIN2 and LTI6b, a cold-  
225 inducible membrane protein, which is trafficked from the plasma membrane to endosomes  
226 through a BFA regulated pathway (Kurup et al., 2005; Shibasaki et al., 2009). In both short and  
227 long term arsenite treatments, BFA-induced PIN1 and LTI6b bodies were formed (Figures 3C



228 and 3D; Supplemental Figures 7C and 7D), suggesting that arsenite specifically targets PIN2  
229 trafficking.

### 230 **Arsenite transport is altered in *pin2/eir1-1* root**

231 In bacteria and yeast, arsenite transport mechanism is extensively studied. In yeast,  
232 arsenite is effluxed out of the cells by Acr3, a plasma membrane-localized efflux carrier and  
233 some aquaglyceroporines, functioning as bidirectional arsenite transporters (Maciaszczyk-  
234 Dziubinska et al., 2012; Yang et al., 2012). In bacteria, arsenite uptake and efflux is passively  
235 regulated by the bidirectional aquaglyceroprotein channels and also pumped outside of the cells  
236 by ArsB or ArsAB functioning as  $\text{As}(\text{OH})_3\text{-H}^+$  antiporter or ATP-driven extrusion pump,  
237 respectively. Some bacteria possess both ArsAB and Acr3 efflux systems (Meharg and Zhao,  
238 2012; Yang et al., 2012).

239 However, in plants, several aquaglyceroprotein NIPs have been shown to regulate passive,  
240 gradient driven arsenite uptake, while only a single protein, rice Lsi2, has been implicated in  
241 active regulation of arsenite efflux. Rice Lsi2 is a silicon transporter and shows 18% homology  
242 with bacterial arsenite transporter, ArsB (Ma et al., 2008; Meharg and Zhao, 2012). Since PIN2  
243 shows a higher homology with ArsB compared with Lsi2, *pin2/eir1-1* mutant shows  
244 hypersensitive response to arsenite-induced root growth inhibition, and arsenite specifically  
245 targets the PIN2 trafficking, we hypothesized that PIN2 may mediate arsenite transport in root.  
246 To clarify this possibility, we combined  $^{74,73}\text{As}$  (III) direct transport assay, ICP-MS analysis of  
247 arsenic accumulation, and speciation and localization of arsenic in roots using high resolution  
248 synchrotron X-ray fluorescence imaging (XFI) analysis coupled with X-ray absorption  
249 spectroscopy (XAS).

250 One of the most reliable methods to show transport activity of a plant protein is direct  
251 transport assay *in planta*. For arsenite, this is a challenging issue as it is not commercially  
252 available. We solved the problem by developing radioactive arsenite ( $^{74,73}\text{As}$ ) by chemical  
253 reduction of radioactive arsenic (see supplemental methods for detail explanation). A short term  
254  $^{74,73}\text{As}$  transport assay (2h) was performed to compare arsenite transport activity in wild type and  
255 *pin2/eir1-1* mutant plants using radioimaging. Five-day old wild type and *pin2/eir1-1* seedlings  
256 were incubated in 0.1 and 10  $\mu\text{M}$   $^{74,73}\text{As}$  for 2h. The quantification of radioimaged plates

257 revealed a noticeable increase in  $^{74,73}\text{As}$  activity in *pin2/eir1-1* roots compared with wild-type  
258 roots (Figures 4A and 4B), suggesting that arsenite transport is impaired in *pin2/eir1-1* mutant.

259 To confirm the radioimaging results, we also performed direct scintillation counting  
260 experiment using individual roots. A noticeable increase in  $^{74,73}\text{As}$  activity was observed in  
261 *pin2/eir1-1* roots for all tested arsenite concentrations (Figure 4C). Collectively, these results  
262 suggest the possibility that As(III) species could serve as a transport substrate for PIN2 and  
263 hence loss of PIN2 functioning would result in higher intracellular accumulation of arsenite.

#### 264 **Arsenic content is higher in *pin2/eir1-1* mutant**

265 Due to the low specific activity of  $^{74,73}\text{As}$ , the radioactive transport assay was conducted  
266 on whole plant roots. However, PIN2 is preferentially expressed in meristem and elongation  
267 zone (Xu and Scheres, 2005; Shibasaki et al., 2009). To confirm the functional role of PIN2 in  
268 As(III) transport, we determined arsenic concentrations in the 5mm-long root tips after short  
269 term (2h) exogenous arsenite treatment using ICP-MS. Compared with wild-type, almost two-  
270 fold increase in arsenic accumulation was observed in *pin2/eir1-1* mutant plants (Figure 4D).  
271 Similar results were observed for a long term (3d) arsenite treatment (Supplemental Figure 8).

#### 272 **PIN2 is incapable of transporting arsenite in *ycf1Δ acr3Δ* deletion mutant of *S. cerevisiae***

273 Heterologous expression system is another approach to assess the protein transporter  
274 activity. Besides the bacterial arsenite transporters ArsB, AtPINs show homology (18%) to  
275 arsenite transporters Acr3 from *S. cerevisiae* (Table 1). Arsenite export by Acr3p is one of the  
276 most important arsenic detoxification mechanisms discovered in *S. cerevisiae* (Ghosh et al.,  
277 2002). Another protein affecting arsenite resistance of yeast, Ycf1p, is located at the vacuolar  
278 membrane. Ycf1p, a member of the multidrug resistance (MRP) group of the ABC superfamily  
279 of drug resistance ATPases, mediates the active transport of glutathione-conjugated toxic  
280 compounds, including the product of arsenite sequestration, As(GS)<sub>3</sub> in the yeast vacuole (Ghosh  
281 et al., 2002).

282 Hence, for testing the arsenite transport activity of PIN2, we selected the yeast strain  
283 lacking both Acr3p and Ycf1p (*ycf1Δ acr3Δ*). Expression of Acr3 in *ycf1Δ acr3Δ* did result in  
284 increased resistance to arsenite in growth assay and reduced accumulation of arsenite in transport

285 assay. However, PIN2 did not show any arsenite transport activity (Supplemental Figure 9).  
286 These results suggest that even if PIN2 may be involved in arsenite transport in plants, it is not  
287 functional as such in *S. cerevisiae*. This finding is not inconsistent as in numerous studies it has  
288 been shown that the expression of plant proteins in heterologous system widely varies depending  
289 on the system that is used, and in many cases plant proteins either do not express in heterologous  
290 system or not showing the same functionality (Ma et al., 2008; Dreher et al., 2006; Barbosa et  
291 al., 2018). However, the members of PINs have been expressed in a variety of heterologous  
292 systems, including *S. cerevisiae*, fission yeast *Shizosaccharomyces pombe*, human *HeLa* cultured  
293 cells, and *Xenopus laevis* oocytes, as reviewed in (Barbosa et al., 2018). Arabidopsis PIN1, PIN2  
294 and PIN7 were previously successfully expressed in *S. pombe* and showed comparable  
295 expression levels and IAA export activity (Yang and Murphy, 2009). Unfortunately, the proteins  
296 from the Acr3 family of transporters are widely distributed in prokaryotes and fungi with the  
297 exception of *S. pombe* (Wysocki et al., 2003; Mansour et al., 2007), and hence the current assay  
298 protocol need to be modified to be used for studies of arsenite using this system. Testing of the  
299 available *S. pombe* strains and other heterologous systems to study properties of PIN2 as  
300 transporter of trivalent arsenicals will be a topic of our future research.

### 301 **Speciation and localization of arsenic by Synchrotron X-ray Fluorescence Imaging**

302 High resolution synchrotron X-ray fluorescence imaging (XFI) coupled with XAS is a  
303 powerful technique to identify the localization and chemical speciation of metals and metalloids  
304 in situ (Pickering et al., 2000). In this study, application of the synchrotron techniques pursued  
305 the following goals: 1) to compare the patterns of arsenic distribution and its relative  
306 concentrations in the roots of arsenite-exposed wild type and *pin2/eir1-1* mutant plants, and 2) to  
307 determine chemical speciation of arsenic accumulated in the different tissues of wild type and  
308 mutant plants, using micro-XAS and bulk XAS techniques.

309 Since the short term and long term treatments with exogenous arsenite essentially  
310 produced similar trends in PIN2 trafficking (Figure 3; Supplemental Figure 7), and arsenic  
311 accumulation (Figure 4D; Supplemental Figure 8), in the synchrotron experiments we used long  
312 term (3 day) arsenite-treated plants to simplify plant transportation.

313 XFI imaging revealed a striking difference in arsenite localization in wild-type and  
314 *pin2/eir1-1* roots (Figures 5A and 5B). While arsenic accumulated at the very end of the root tip

315 of arsenite exposed *pin2/eir1-1* mutant, the arsenic distribution seems to be more diffuse in the  
316 root apical meristem of wild-type (Figures 5A and 5B). Calculations of arsenic areal densities in  
317 the comparable portions of the apical root meristem in arsenite-exposed wild type and *pin2/eir1-*  
318 *1* root samples using XFI maps revealed 2-3 times higher mean values for arsenic in *pin2/eir1-1*  
319 root tips compared with that of wild-type (Table 2; Figure 5F ). These results are consistent with  
320 the observed difference in accumulation of arsenic in wild type and *pin2/eir1-1* root tips and  
321 whole root determined by ICP-MS (Figure 4D; Supplemental Figure 8), confirming that  
322 mutations in PIN2 lead to altered arsenic response in *A. thaliana*.

323 The micro-XAS analysis of As K-edge (near edge spectra) was conducted at various parts  
324 of the roots as shown in Figure 5C. The results of principal component analysis (PCA) and least-  
325 square fitting of linear components of near-edge micro-XAS show that the majority of the  
326 arsenic is best represented by As(III)-tris-thiolate complex (Figures 5D and 5E). For arsenic  
327 imaging, a similar thiolate complex was observed in Indian Mustard (*Brassica juncea*), which  
328 belongs to the same *Brassicaceae* family as *A. thaliana* (Pickering et al., 2000).

329 The XFI elemental maps at the micron and sub-micron scale allowed us to compare  
330 accumulation of arsenic and other biologically important elements in the root apical meristem of  
331 *pin2/eir1-1* and wild type. The elemental analysis data are presented in Table 2. Root tips of  
332 arsenite-exposed *pin2/eir1-1* showed 2-3 fold higher arsenic accumulation compared with the  
333 wild-type root tip. For other elements like Fe, Zn and Ca, no large differences in accumulation  
334 were observed between wild-type and *pin2/etr1-1* (Table 2; Supplemental Figures 11 and 12).  
335 Collectively, these results support the results of the radioactive arsenite transport assay and ICP-  
336 MS measurements that arsenic accumulates in higher levels in root meristem zone of *pin2/eir1-1*  
337 as compared to wild type plants.

## 338 Discussion

339 In this work, we provide a new insight into the role of auxin efflux carrier PIN2 in  
340 regulating root arsenite response as well as in facilitating the intracellular transport of As (III)  
341 species. Several lines of molecular and cellular evidence suggest that response of *Arabidopsis*  
342 root to arsenite but not arsenate is tightly linked to altered intracellular auxin homeostasis,  
343 regulated by auxin efflux carrier PIN2. Consistently, the loss-of-function mutant *pin2/eir1-1*

344 plants exhibits striking phenotypic changes in the root morphology, and accumulated 2-3 fold  
345 higher arsenic concentrations in root apices compared to that of wild-type plants. The arsenite  
346 response in root was found to be linked to altered auxin homeostasis. Arsenite inhibited the  
347 shootward auxin transport and subsequently the intracellular auxin distribution, which was  
348 supported by the observed altered signal intensities and distribution patterns in auxin marker  
349 lines. We further demonstrated that arsenite-induced change in auxin distribution is directly  
350 linked to the intracellular trafficking of PIN2. Analysis of cellular localization and trafficking of  
351 PIN2 and two other membrane proteins PIN1 and LTI6b, all of which is trafficked from the  
352 plasma membrane to endosome through a BFA regulated pathway (Shibasaki et al., 2009;  
353 Geldner et al., 2001; Kurup et al., 2005), revealed that arsenite specifically inhibits the PIN2  
354 trafficking as in presence of Arsenite, formation of BFA bodies was abolished only for PIN2 but  
355 not for PIN1 and LTI6b.

356 Comparison of arsenic transport dynamics and arsenic accumulation in wild-type and  
357 *pin2/eir1-1* mutant plants by *in planta* transport assay, ICP-MS and high resolution synchrotron  
358 fluorescence imaging coupled with micro-XAS at selected root meristem provides evidence that  
359 arsenite efflux in *A. thaliana* is linked to PIN2 functioning. The highest As accumulation areas in  
360 the elemental maps of *pin2/eir1-1* mutants obtained by synchrotron XFI were in the root cap and  
361 epidermis of apical meristem, the same tissues where PIN2 would be normally expressed in wild  
362 type. Moreover, the arsenic content but not the other elements such as Fe, Zn and Ca in  
363 *pin2/eir1-1* root tip and the epidermis/cortical zones of apical meristem was significantly  
364 elevated compared to wild-type. This increased accumulation of arsenite is correlated with  
365 slower gravity response and reduced root growth in wildtype, altered root curling phenotype and  
366 hypersensitive root growth in *pin2/eir1-1*. Collectively, these results demonstrate the importance  
367 of PIN2 in cellular arsenite efflux.

368 In contrary to an earlier study (Krishnamurthy and Rathinasabapathi, 2013), where it  
369 was claimed that both *pin1* and *pin2* showed hypersensitive response to arsenite-induced root  
370 growth inhibition, we did not find any effect of arsenite on PIN1 neither in the root growth nor in  
371 trafficking assays. We found several other discrepancies in this work. For instance, the author  
372 claimed that exogenous IAA treatment alleviates arsenite tolerance in *aux1*, which is not  
373 explainable as numerous studies showed that *aux1* is IAA resistant and IAA uptake is

374 significantly reduced in *aux1* (Pickett et al., 1990; Marchant et al., 1999; Rahman et al., 2001).  
375 The authors also claimed that arsenite inhibits auxin uptake. However, the authors performed  
376 acropetal and basipetal transport experiments which are completely different from the auxin  
377 uptake experiment and do not truly represent the auxin uptake status of the root (Shibasaki et al.,  
378 2009; Hanzawa et al., 2013; Rashotte et al., 2000, 2001; Lewis et al., 2007). The only substantial  
379 difference in these two works was the plant growth condition; while they used an alternating  
380 light/dark regime, we used continuous light. However, the observed discrepancies are difficult to  
381 explain with the light conditions. Hence, the conclusions derived from this study should be  
382 carefully interpreted and re-evaluated.

383         It might seem paradoxical that arsenite specifically targets the intracellular cycling of  
384 PIN2, although PIN2 and PIN1 show similar homology to several arsenite transporters Sc ACR3,  
385 PV ACR3 and *arsB*. However, this is not inconsistent as PIN1 and PIN2 use distinct pathways  
386 for trafficking and cellular targeting (Krecek et al., 2009). For instance, in roots of *A. thaliana*,  
387 PIN1 is expressed only in the central cell files, where it always shows a polarization towards the  
388 rootward domain of the plasma membrane (Geldner et al., 2001). On the other hand, PIN2 is  
389 expressed in the lateral root cap cells, epidermis and cortex with a mixed polarity. In LRC,  
390 epidermis and mature cortical cells, PIN2 shows a polarization towards the shootward domain of  
391 plasma membrane as opposed to PIN1 polarization, while in meristematic cortical cells, it shows  
392 rootward polarization like PIN1 (Rahman et al., 2007, 2010). The subcellular targeting  
393 mechanisms of PIN1 and PIN2 are also distinct. Newly synthesized nonpolar PIN1 and  
394 meristematic cortical PIN2 achieve the rootward polarity through ARF-GEF, such as GNOM,  
395 and the phosphorylation status of the protein, which is regulated by the counter balancing  
396 activities of PINOID kinase and protein phosphatase 2A. Rootward polarity of PIN1 and cortical  
397 PIN2 can be reversed to shootward by altering the phosphorylation status of the protein through  
398 over expression of PID kinase or by reducing the protein phosphatase activity through genetic or  
399 pharmacological approaches (Rahman et al., 2010; Michniewicz et al., 2007; Friml et al., 2004;  
400 Kleine-Vehn and Friml, 2008). However, PIN1 and meristematic cortical PIN2 showed  
401 differential phosphorylation requirements for relocalization towards shootward domain (Rahman  
402 et al., 2010b). Moreover, polarization of PIN2 in LRC, and in epidermal cells is completely  
403 independent of this pathway (Hanzawa et al., 2013; Rahman et al., 2010; Friml et al., 2004).  
404 These results exclusively suggest that trafficking pathways of PIN1 and PIN2 are distinct and

405 support our observation that arsenite selectively targets the machinery that only regulates PIN2  
406 trafficking.

407 PIN2 belongs to the same bile/arsenite/riboflavin transporter (BART) superfamily as the  
408 Acr3 (arsenical resistance 3) family of arsenite transporters, shows a moderate homology to  
409 ArsB transporters from As(III)/Sb(III) group and, also to a silicic acid OsLsi2 transporter (which  
410 also serves as As(III) efflux transporter in rice. Further, multiple sequence alignment of PINs  
411 revealed a variable number of cysteines encoded by the different gene family (Retzer et al.,  
412 2017). Among PINs, PIN2 is unique as it contains only two evolutionary conserved cysteine.  
413 The 2-D modeling of PIN2 revealed that both conserved cysteines localize to the cytoplasmic  
414 side of the plasma membrane. These two cytosol-facing cysteines are an easy target for  
415 formation of –SH bonds between PIN2 and As(III) species. Additionally, these cysteine residues  
416 have been shown to be intrinsically involved in regulating the intracellular trafficking of PIN2  
417 (Retzer et al., 2017). This is a feature which is also conserved in the majority of eukaryotic  
418 members of the Acr3 permeases (the arsenite transporters found in many groups of prokaryotes  
419 and eukaryotes. Their function, as was determined by mutational analysis in *S. cerevisiae*, is to  
420 facilitate Acr3p trafficking to the plasma membrane and, hence As(III) efflux (Maciaszczyk-  
421 Dziubinska et al., 2012). On the other hand, bacterial arsenite efflux transporter ArsB, has one  
422 cysteine. ArsB is not related to Acr3, but both types were proposed to function as  $\text{As}(\text{OH})_3/\text{H}^+$   
423 antiporters (Yang et al., 2012). Cysteine-rich OsLsi2 belongs to the same family as ArsB, and  
424 function as  $\text{As}(\text{III})/\text{H}^+$  efflux transporter in plant root cells (Ma et al., 2008). The similar cysteine  
425 availability in PIN2 like other arsenite transporters, and the involvement of cysteine residues in  
426 regulating the protein trafficking provide a plausible explanation for PIN2 functioning as arsenite  
427 transporter and alteration of PIN2 trafficking by arsenite.

428 In many species, removal of arsenite from the cytoplasm is mainly regulated by energy  
429 coupled systems. In bacteria and yeast, ATP coupled ArsAB, and  $\text{H}^+$  coupled ArsB and Acr3  
430 function in active extrusion of arsenite (Yang et al., 2012). ArsB can also function as a subunit of  
431 the ArsAB As(III)-translocating ATPase, an ATP-driven efflux pump. In this complex, As(III)  
432 binding to three thiols of ArsA induces a conformational change that increases the rate of ATP  
433 hydrolysis and, consequently, the rate of As(III) extrusion by the ArsAB pump. Experimental  
434 evidence in oocytes suggests that efflux of silicon by Lsi2 is an energy-dependent active process

435 driven by the proton gradient. However, expression of Lsi2 in oocytes, yeast and bacteria did not  
436 show any arsenite transport activity (Ma et al., 2008). Similarly, expression of PIN2 in  
437 *S.cerevisiae* did not show any arsenite transport activity either. These results also highlight the  
438 possibility that these proteins function *in planta* is aided by other proteins, which are absent in  
439 the heterologous system and hence failed to show the expected transport activity.

440 PINs have been shown to interact with another group of membrane transporter family  
441 protein PGP/ABCs (ATP-binding cassette transporters of the B subfamily), involved in auxin  
442 transport (Zazimalová et al., 2010; Geisler et al., 2017; Blakeslee et al., 2007; Cho et al., 2012).  
443 “Concerted” interactions have been shown between ABCB19 and PIN1 or ABCB1/ABCB4 and  
444 PIN2 in auxin transport in polar PM domains, where ABCBs and PINs can physically interact  
445 (Blakeslee et al., 2007; Titapiwatanakun et al., 2009; Cho et al., 2012). It was also proposed that  
446 while members of the ABCB and PIN families can function as independent auxin transport  
447 catalysts, “a strict co-operative or mutual functionality” cannot be excluded (Geisler et al., 2017).  
448 In many organisms, proteins from PGP/ABCB/MDR group are involved in active efflux of  
449 various xenobiotics, including metals, from the cells. In fact, MDR1/ABCB1 gene codes a P-  
450 glycoprotein was the first ABC transporter correlated with arsenic resistance in human renal  
451 carcinoma cells (Maciaszczyk-Dziubinska et al., 2012). We speculate that selected plant ABCB  
452 transporters could also interact with PIN2 in a manner analogous to ArsAB ATPase complex in  
453 extrusion of arsenic.

454 Although the uptake mechanism of arsenite in plant is largely understood, efflux  
455 mechanisms as well as root response mechanism to arsenite remain elusive. The findings of the  
456 present study that PIN2 and auxin are intrinsically involved in regulating arsenite responses in  
457 roots, and that PIN2 functions as a possible arsenite efflux transporter open a new door to our  
458 understanding. Future studies aiming to identify the substrates of arsenite that are effluxed by  
459 PIN2 or Lsi2 through structural NMR study, and elucidating the substrate binding domains in  
460 these proteins would further enhance our understanding of arsenite efflux mechanism.

## 461 **Materials and Methods**

### 462 **Plant materials**



463 All lines except, *pin1-3* [Ler background (Bennett et al., 1995)], EGFP-LTI6b [C24  
464 background (Kurup et al., 2005)], are in the Columbia background of *Arabidopsis thaliana* (L.).  
465 *eir1-4* 35S-PIN2 (Abas et al., 2006) was a gift from Christian Luschnig (University of Natural  
466 Resources and Life Science, Vienna). *PIN2-GFP* (Xu and Scheres, 2005) was the gift of B.  
467 Scheres (University of Utrecht, The Netherlands); DII-VENUS (Brunoud et al., 2012) was a gift  
468 from Malcolm Bennett (University of Nottingham, UK). *pin1-3*, *pin3-4*, *pin4-3* and GFP-LTI6b  
469 were provided by Gloria Muday (Wake Forest University, Winston-Salem, NC, USA). Col-0,  
470 *eir1-1* and PIN1-GFP were obtained from the Arabidopsis Biological Resource Centre  
471 (Columbus, OH, USA).

## 472 **Growth conditions**

473 Surface-sterilized seeds were germinated and grown for 5 days containing 1% w/v  
474 sucrose and 1% w/v agar (Difco Bacto agar, BD laboratories; <http://www.bd.com>) in a growth  
475 chamber (NK system, LH-70CCFL-CT, Japan) at 23° C under continuous white light (at an  
476 irradiance of 80-100  $\mu\text{mol m}^{-2} \text{s}^{-1}$ ; Shibasaki et al., 2009). The seedlings were grown vertically  
477 for 5 days and then transferred to new plates with or without arsenite and arsenate, and  
478 incubated for various time lengths under continuous light at irradiance of 80-100  $\mu\text{mol m}^{-2} \text{s}^{-1}$   
479 (NK system, LH-1-120.S, Japan). After the incubation, the pictures of the seedlings were taken  
480 using a digital camera (Canon; Power Shot A 640, <http://canon.jp/>) and root elongation of the  
481 seedlings were analyzed by an image analyzing software Image J (<http://rsb.info.nih.gov/ij/>).  
482 *pin1-3* was maintained as heterozygous and homozygous seedlings were selected using the fused  
483 cotyledon phenotype as described earlier (Aida et al., 2002).

## 484 **Chemicals**

485 Sodium (meta) arsenite ( $\text{NaAsO}_2$ ) and sodium arsenate dibasic heptahydrate  
486 ( $\text{Na}_2\text{HAsO}_4 \cdot 7\text{H}_2\text{O}$ ) were purchased from Kanto Chemical Co. (Tokyo, Japan). BFA was  
487 purchased from Sigma-Aldrich Chemical Co.(USA). [ $^3\text{H}$ ] IAA (20 Ci  $\text{mmol}^{-1}$ ) was purchased  
488 from American Radiolabeled Chemicals, Inc. (St. Louis, MO, U.S.A., <http://www.arc-inc.com>).  
489 The chemicals for growth media and standards used in synchrotron experiments were purchased  
490 from Sigma-Aldrich Chemical Co. (Canada). Other chemicals were from Wako Pure Chemical  
491 Industries (<http://www.wako-chem.co.jp/>).

## 492 **Bioinformatics analysis**

493 Protein sequences of AtPIN1 (AT1G73590), AtPIN2 (AT5G57090), AtPIN3  
494 (AT1G70940), AtPIN4 (AT2G01420) and AtPIN7 (AT1G23080) were collected from TAIR  
495 ([www.arabidopsis.org](http://www.arabidopsis.org)). *Saccharomyces cerevisiae* Acr3 (190409919), *Pteris vittata* Acr3  
496 (310768536), *Escherichia coli* arsenite transporter ArsB (1703365), and *Oryza sativa* silicon  
497 transporter Lsi2 (296936086) were collected from NCBI ([www.ncbi.nlm.nih.gov](http://www.ncbi.nlm.nih.gov)) protein  
498 database. Multiple sequence alignment (Supplemental Figures 2 and 3) and identity matrix  
499 (Table 1, Supplemental Tables 1, 2 and 3) are generated using Clustal Omega (Sievers et al.,  
500 2011) (<http://www.ebi.ac.uk/Tools/msa/clustalo/>) multiple sequence alignment tool. Cladogram  
501 of plasma membrane residing PIN proteins (AtPIN1, AtPIN2, AtPIN3, AtPIN4, AtPIN7)  
502 (Supplemental Figure 1) from *Arabidopsis thaliana* were constructed using MEGA6 (Tamura et  
503 al., 2013) (Molecular Evolutionary Genetics Analysis) software based on Neighbor Joining  
504 method and 1000 bootstrap test.

505

## 506 **Gravitropism assay**

507 Root tip reorientation was assayed as described earlier (Rahman et al., 2010). In brief, 5-  
508 day-old vertically grown seedlings were transferred to new square plates in presence or absence  
509 of arsenite. After the transfer, the roots were gravistimulated at 23°C by rotating the plate 90°.  
510 To measure the curvature of roots and elongation, photographs of plates were taken at specific  
511 time points after reorientation using a digital camera (Canon; Power Shot A 640, <http://canon.jp/>)  
512 and analyzed by an image analyzing software Image J (<http://rsb.info.nih.gov/ij/>). Data were  
513 obtained from three biological replicates.

## 514 **Transport assay**

### 515 **i) Auxin transport assay**

516 5-day-old vertically grown *Arabidopsis* seedlings were transferred to agar plate and  
517 incubated with or without 10µM arsenite for 3 days. Shootward auxin transport was measured as  
518 described earlier (Shibasaki et al., 2009). In brief, a donor drop was prepared by mixing 0.5 µM  
519 [<sup>3</sup>H] IAA (3.7 MBq ml<sup>-1</sup>) in 1.5% agar containing MES buffer solution. The donor drop was  
520 placed on the edge of the root tip. Plates were then incubated vertically at 23°C for 2 h. To

521 measure auxin transport, 5 mm root segments away from the apical 2 mm were carefully cut and  
522 soaked for overnight in 4 mL liquid scintillation fluid (ULTIMA GOLD, PerkinElmer, USA),  
523 and the radioactivity was measured with a scintillation counter (model LS6500, Beckman ACSII,  
524 USA Instruments, Fullerton, CA). Data were obtained from at least three biological replicates.

## 525 **ii) Arsenite transport assay**

526  $^{74,73}\text{As}$  (III) prepared from radioactive arsenic ( $^{74,73}\text{As}$ ) was used for transport assay.  
527 ( $^{74,73}\text{As}$  (III) preparation method is described in detail in supplemental method section). 5-day-  
528 old vertically grown Col-0 and *eir1-1* seedlings were incubated in Hoagland solution containing  
529 0.1 and 10  $\mu\text{M}$  labeled  $^{74,73}\text{As}$  (III) (approximately  $5\text{KBq ml}^{-1}$ ) for 2h and transferred to a fresh  
530 plate to separate root and shoot samples. For radioluminography, the seedling roots were  
531 incubated in 0.1 and 10  $\mu\text{M}$  and then placed on a Kraft paper using double-sided tape. The  
532 sample was exposed to an imaging plate (IP; BASIP MS, GE Healthcare Lifescience) and the  
533 radiation distribution was visualized by FLA-5000 Image Analyzer (FUJIFILM). Arsenic  
534 contents in seedlings were calculated from the value of photostimulated luminescence in the  
535 imaging data. Data were obtained from three biological replicates.

536 For liquid scintillation count, individual whole root sample was taken in separate  
537 tubes and 10 individual roots were considered for each treatment. Individual root sample was  
538 collected in a vial with scintillation cocktail (MICROSCINT 40, PerkinElmer) and  $^{74,73}\text{As}$   
539 activity was measured by liquid scintillation counter (Tri-Carb 4810 TR, PerkinElmer) with the  
540 window of 0 to 2000 keV.

## 541 **Live cell imaging and GUS staining**

542 For live cell microscopy, five-day-old GFP or DII-VENUS transgenic seedlings were used.  
543 For short term BFA treatment, five-day-old seedlings were incubated in 10  $\mu\text{M}$  arsenite for 2h  
544 and then subjected to 20  $\mu\text{M}$  BFA for 40 minutes. For long term five-day-old seedlings were  
545 incubated with or without 10  $\mu\text{M}$  arsenite for additional 3 days. After the incubation, BFA  
546 treatment was performed as described above. After the BFA incubation, the seedlings were  
547 mounted in liquid growth medium on a cover glass for observation on a Nikon laser scanning  
548 microscope (Eclipse Ti equipped with Nikon C2 Si laser scanning unit) and imaged with as x40  
549 water immersion objective.

550 The accumulation of BFA bodies in PIN2-GFP was quantified in the transition area of the  
551 root tip as described earlier (Shibasaki et al., 2009). The pictures were taken approximately at the  
552 same place of the root and using same confocal settings. The number of BFA bodies and cells  
553 were counted for each root and expressed as BFA body/cell. Data were obtained from at least  
554 three biological replicates. DII-Venus imaging and GUS staining are described in supplementary  
555 section.

#### 556 **Measurement of arsenic content in plants**

557 For short term treatment, five day old wild-type and *pin2/eir1-1* seedlings were  
558 transferred to Hoagland solution containing 10  $\mu$ M and 100  $\mu$ M arsenite and incubated for 2h.  
559 After incubation, roots were washed three times and 5 mm root tip were cut dried and weighed.  
560 20 root tips were collected into a vial. After digestion by nitric acid, As content in the sample  
561 solution was measured by inductively coupled plasma mass spectrometry (ICP-MS) (NexION  
562 350S, PerkinElmer). For the long term treatment, 5 day old seedlings were treated for 3 days in  
563 arsenite-spiked agarose growth media and As content in roots and shoots was measured as  
564 described above.

#### 565 **Expression of PIN2 in *ycf1* $\Delta$ *acr3* $\Delta$ mutant of *S. cerevisiae***

566 Since arsenite resistance in *S. cerevisiae* is largely mediated by Acr3p and Ycf1p, we  
567 used the yeast strain lacking both Ycf1p and Acr3p (*ycf1* $\Delta$  *acr3* $\Delta$ ). PIN2 and Acr3p were cloned  
568 in pKT10 vector, transformed into the double knock out strain and selected with AHCW/Glc  
569 medium. Preparation of double knock out strain, cloning of PIN2 and Acr3p, growth and  
570 transport assays are described in detail in supplementary method.

571

#### 572 **X-ray fluorescence imaging (XFI) and X-ray absorption spectroscopy (XAS)**

573 Synchrotron XFI was performed at the Stanford Synchrotron Radiation Lightsource  
574 (SSRL), Stanford University, Menlo Park, CA, USA (beamlines 10-2 and 2-3) and at the  
575 Advanced Photon Source (APS), Argonne National Laboratory, Lemont, IL, USA (beamline 2-  
576 ID-E). Micro-XAS analysis of selected arsenic hot spots in the samples at a room temperature  
577 was performed at the beamline 2-3 (SSRL), and bulk As K-edge XAS of frozen plant tissues and  
578 growth medium was conducted in a helium cryostat environment at the beamline 7-3 (SSRL).

579

## 580 **Preparation of Samples for synchrotron XFI imaging**

581 *Col-0* and *pin2/eir1-1* were grown as described above. 5-d-old seedlings were treated  
582 with 10 $\mu$ M arsenite in growth medium for 3 days. After the treatment, control and arsenite-  
583 exposed plants were harvested, washed in de-ionized (DW) water and either flash frozen for  
584 consecutive bulk XAS analysis or imaged as described below and, in more detail, in SI.

585

## 586 **XFI of whole plants**

587 Elemental mapping of whole plants using XFI was performed at the wiggler beamline 10-  
588 2 (SSRL). The samples were mounted at 45° to the incident beam and raster scanned (pixel size  
589 35  $\mu$ m x 35  $\mu$ m) with beam dwell time 100 ms per pixel (Supplemental Figure 10, see SI for  
590 details). Fluorescent energy windows were centered for As, Fe and other elements of interest (P,  
591 S, K, Ca, Zn, Cu, Mn).

592

## 593 **Micro XFI and Micro-XAS of selected plant tissues**

594 Higher resolution imaging (2 – 10  $\mu$ m) of selected tissues of interest (areas of the apical  
595 root meristem of live main roots) were performed at the bending magnet beamline 2-3 (SSRL)  
596 with the same geometric and fluorescent energy detection setup as described for the beamline 10-  
597 2 above. After high resolution images were obtained, we collected micro-XAS As-K near-edge  
598 spectra in the As ‘hotspots’ and other areas of interest.

## 599 **Bulk XAS at the beamline 7-3 (SSRL)**

600 The pre-washed roots and freshly made agar medium were flash-frozen in the liquid  
601 nitrogen in separate Lucite cells and measured at the wiggler beamline 7-3 (SSRL) at ~ 10K  
602 using helium cryostat. The micro-XAS and bulk XAS spectra were analyzed using EXAFSPAK  
603 (<http://ssrl.slac.stanford.edu/~george/exafspak/manual.pdf>) suite of programs (see SI for the  
604 details).

## 605 **X-ray Fluorescence Microscopy at the APS (2-ID-E station)**

606 X-ray fluorescence microscopy (XFM) of fresh hydrated root apical meristem with 1  
607 micron and 300 nm resolution was conducted at the 2-ID-E X-ray fluorescence microprobe  
608 station of the Advanced Photon Source (APS), as described in SI. The fitting of two-dimensional  
609 elemental maps and analysis of the regions of interest (ROI) analysis were performed using  
610 MAPS software (Nietzold et al., 2018).

### 611 **Statistical Analysis**

612 Results are expressed as the means  $\pm$  S.E.M from appropriate number of experiments as  
613 described in the figure legends. Two-tailed Student t-test was used to analyze statistical  
614 significance.

### 615 **Author contributions:**

616 A.R., O.P., G.N.G., I.J.P., designed the research. M.A.A., M.S.,M.A., C.D.K., O.P., N.V.D., S.N.,  
617 O.A., T.K., and A.R. performed the experiments. K.T., K.M., and K.N., produced the radioactive  
618 arsenite. C.L. provided materials and comments. M.A.A., O.A., O.P., K.T.,and A.R., analyzed  
619 the data. M.A.A, O.P, N.V.D., G.N.G, I.J.P, K.T., T.K., and A.R., wrote the paper.

620

### 621 **Acknowledgement**

622 This work was supported in part by the Iwate University President Fund (to A.R.), and  
623 Global Innovation Fund, University of Saskatchewan (to I.J.P., G.N.G., A.R). Research at the  
624 University of Saskatchewan is supported by grants from the Natural Sciences and Engineering  
625 Research Council of Canada (G.N.G., I.J.P.), the Saskatchewan Health Research Foundation  
626 (G.N.G., I.J.P.), The University of Saskatchewan, and by Canada Research Chairs (G.N.G.,  
627 I.J.P.).

628 Resource of the Advanced Photon Source is supported by the U.S. Department of Energy (DOE)  
629 Office of Science User Facility operated for the DOE Office of Science by Argonne National  
630 Laboratory under Contract No. DE-AC02-06CH11357.

631 Use of the Stanford Synchrotron Radiation Lightsource, SLAC National Accelerator Laboratory,  
632 is supported by the U.S. Department of Energy, Office of Science, Office of Basic Energy

633 Sciences under Contract No. DE-AC02-76SF00515. The SSRL Structural Molecular Biology  
634 Program is supported by the DOE Office of Biological and Environmental Research, and by the  
635 National Institutes of Health, National Institute of General Medical Sciences (including  
636 P41GM103393). The contents of this publication are solely the responsibility of the authors and  
637 do not necessarily represent the official views of NIGMS or NIH.

## 638 **References**

- 639 **Abas, L., Benjamins, R., Malenica, N., Paciorek, T.T., Wiřniewska, J., Moulinier-Anzola,**  
640 **J.C., Sieberer, T., Friml, J., and Luschnig, C.** (2006). Intracellular trafficking and  
641 proteolysis of the Arabidopsis auxin-efflux facilitator PIN2 are involved in root  
642 gravitropism. *Nat. Cell Biol.* **8**: 249–256.
- 643 **Aida, M., Vernoux, T., Furutani, M., Traas, J., and Tasaka, M.** (2002). Roles of PIN-  
644 FORMED1 and MONOPTEROS in pattern formation of the apical region of the  
645 Arabidopsis embryo. *Development* **129**: 3965–3974.
- 646 **Ashraf, M.A. and Rahman, A.** (2019). Cold stress response in Arabidopsis thaliana is mediated  
647 by GNOM ARF-GEF. *Plant J.* **97**: 500–516.
- 648 **Band, L.R. et al.** (2012). Root gravitropism is regulated by a transient lateral auxin gradient  
649 controlled by a tipping-point mechanism. *Proc. Natl. Acad. Sci.* **109**: 4668–4673.
- 650 **Barbosa, I.C.R., Hammes, U.Z., and Schwechheimer, C.** (2018). Activation and Polarity  
651 Control of PIN-FORMED Auxin Transporters by Phosphorylation. *Trends Plant Sci.* **23**:  
652 523–538.
- 653 **Bennett, S.R.M., Alvarez, J., Bossinger, G., and Smyth, D.R.** (1995). Morphogenesis in  
654 pinoid mutants of Arabidopsis thaliana. *Plant J.* **8**: 505–520.
- 655 **Blakeslee, J.J. et al.** (2007). Interactions among PIN-FORMED and P-glycoprotein auxin  
656 transporters in Arabidopsis. *Plant Cell* **19**: 131–147.
- 657 **Brunoud, G., Wells, D.M., Oliva, M., Larrieu, A., Mirabet, V., Burrow, A.H., Beeckman, T.,**  
658 **Kepinski, S., Traas, J., Bennett, M.J., and Vernoux, T.** (2012). A novel sensor to map  
659 auxin response and distribution at high spatio-temporal resolution. *Nature* **482**: 103–106.

- 660 **Cho, M., Lee, Z.-W., and Cho, H.-T.** (2012). ATP-Binding Cassette B4, an Auxin-Efflux  
661 Transporter, Stably Associates with the Plasma Membrane and Shows Distinctive  
662 Intracellular Trafficking from That of PIN-FORMED Proteins. *Plant Physiol.* **159**: 642–654.
- 663 **Dreher, K.A., Brown, J., Saw, R.E., and Callis, J.** (2006). The Arabidopsis Aux/IAA protein  
664 family has diversified in degradation and auxin responsiveness. *Plant Cell* **18**: 699–714.
- 665 **Ellis, D.R., Gumaelius, L., Indriolo, E., Pickering, I.J., Banks, J.A., and Salt, D.E.** (2006). A  
666 Novel Arsenate Reductase from the Arsenic Hyperaccumulating Fern *Pteris vittata*. *Plant*  
667 *Physiol.* **141**: 1544–1554.
- 668 **Friml, J. et al.** (2004). A PINOID-dependent binary switch in apical-basal PIN polar targeting  
669 directs auxin efflux. *Science* **306**: 862–865.
- 670 **Geisler, M., Aryal, B., Di Donato, M., and Hao, P.** (2017). A critical view on ABC  
671 transporters and their interacting partners in auxin transport. *Plant Cell Physiol.* **58**: 1601–  
672 1614.
- 673 **Geldner, N., Friml, J., Stierhof, Y.D., Jürgens, G., and Palme, K.** (2001). Auxin transport  
674 inhibitors block PIN1 cycling and vesicle trafficking. *Nature* **413**: 425–428.
- 675 **Ghosh, M., Shen, J., and Rosen, B.P.** (2002). Pathways of As(III) detoxification in  
676 *Saccharomyces cerevisiae*. *Proc. Natl. Acad. Sci.* **96**: 5001–5006.
- 677 **Hanzawa, T., Shibasaki, K., Numata, T., Kawamura, Y., Gaude, T., and Rahman, A.** (2013).  
678 Cellular auxin homeostasis under high temperature is regulated through a sorting NEXIN1-  
679 dependent endosomal trafficking pathway. *Plant Cell* **25**: 3424–33.
- 680 **Indriolo, E., Na, G., Ellis, D., Salt, D.E., and Banks, J.A.** (2010). A Vacuolar Arsenite  
681 Transporter Necessary for Arsenic Tolerance in the Arsenic Hyperaccumulating Fern *Pteris*  
682 *vittata* Is Missing in Flowering Plants. *Plant Cell* **22**: 2045–2057.
- 683 **Kamiya, T., Tanaka, M., Mitani, N., Jian, F.M., Maeshima, M., and Fujiwara, T.** (2009).  
684 NIP1;1, an aquaporin homolog, determines the arsenite sensitivity of *Arabidopsis thaliana*. *J.*  
685 *Biol. Chem.* **284**: 2114–2120.



- 686 **Kleine-Vehn, J. and Friml, J.** (2008). Polar Targeting and Endocytic Recycling in Auxin-  
687 Dependent Plant Development. *Annu. Rev. Cell Dev. Biol.* **24**: 447–473.
- 688 **Krecek, P., Skupa, P., Libus, J., Naramoto, S., Tejos, R., Friml, J., and Zazimalová, E.**  
689 (2009). The PIN-FORMED (PIN) protein family of auxin transporters. *Genome Biol.* **10**:  
690 249.
- 691 **Krishnamurthy, A. and Rathinasabapathi, B.** (2013). Auxin and its transport play a role in  
692 plant tolerance to arsenite-induced oxidative stress in *Arabidopsis thaliana*. *Plant, Cell*  
693 *Environ.* **36**: 1838–1849.
- 694 **Kurup, S., Runions, J., Köhler, U., Laplaze, L., Hodge, S., and Haseloff, J.** (2005). Marking  
695 cell lineages in living tissues. *Plant J.* **42**: 444–453.
- 696 **Latowski, D., Kowalczyk, A., Nawieśniak, K., and Listwan, S.** (2018). Arsenic Uptake and  
697 Transportation in Plants. In *Mechanisms of Arsenic Toxicity and Tolerance in Plants*.  
698 (Singapore: Springer).
- 699 **Laxmi, A., Pan, J., Morsy, M., and Chen, R.** (2008). Light plays an essential role in  
700 intracellular distribution of auxin efflux carrier PIN2 in *Arabidopsis thaliana*. *PLoS One* **3**:  
701 e1510.
- 702 **Lee, D.A., Chen, A., and Schroeder, J.I.** (2003). *ars1*, an *Arabidopsis* mutant exhibiting  
703 increased tolerance to arsenate and increased phosphate uptake. *Plant J.* **35**: 637–646.
- 704 **Lewis, D.R., Miller, N.D., Splitt, B.L., Wu, G., and Spalding, E.P.** (2007). Separating the  
705 Roles of Acropetal and Basipetal Auxin Transport on Gravitropism with Mutations in Two  
706 *Arabidopsis* Multidrug Resistance-Like ABC Transporter Genes. *Plant Cell* **19**: 1838–1850.
- 707 **Luschnig, C., Gaxiola, R.A., Grisafi, P., and Fink, G.R.** (1998). EIR1, a root-specific protein  
708 involved in auxin transport, is required for gravitropism in *Arabidopsis thaliana*. *Genes Dev.*  
709 **12**: 2175–2187.
- 710 **Ma, J.F., Yamaji, N., Mitani, N., Xu, X.-Y., Su, Y.-H., McGrath, S.P., and Zhao, F.-J.**  
711 (2008). Transporters of arsenite in rice and their role in arsenic accumulation in rice grain.  
712 *Proc. Natl. Acad. Sci. U. S. A.* **105**: 9931–9935.

- 713 **Maciaszczyk-Dziubinska, E., Wawrzycka, D., and Wysocki, R.** (2012). Arsenic and antimony  
714 transporters in eukaryotes. *Int. J. Mol. Sci.* **13**: 3527–3548.
- 715 **Mansour, N.M., Sawhney, M., Tamang, D.G., Vogl, C., and Saier, M.H.** (2007). The  
716 bile/arsenite/riboflavin transporter (BART) superfamily. *FEBS J.* **274**: 612–629.
- 717 **Marchant, A., Kargul, J., May, S.T., Muller, P., Delbarre, A., Perrot-Rechenmann, C., and**  
718 **Bennett, M.J.** (1999). AUX1 regulates root gravitropism in Arabidopsis by facilitating  
719 auxin uptake within root apical tissues. *EMBO J.* **18**: 2066–2073.
- 720 **Meharg, A.A. and Zhao, F.J.** (2012). *Arsenic & rice.* (Springer).
- 721 **Michniewicz, M. et al.** (2007). Antagonistic Regulation of PIN Phosphorylation by PP2A and  
722 PINOID Directs Auxin Flux. *Cell* **130**: 1044–1056.
- 723 **Nietzold, T., West, B.M., Stuckelberger, M., Lai, B., Vogt, S., and Bertoni, M.I.** (2018).  
724 Quantifying X-Ray Fluorescence Data Using MAPS. *J. Vis. Exp.* **132**: e56042.
- 725 **Okada, K., Ueda, J., Komaki, M., Bell, C., and Shimura, Y.** (1991). Requirement of the  
726 Auxin Polar Transport System in Early Stages of Arabidopsis Floral Bud Formation. *Plant*  
727 *Cell* **3**: 677–684.
- 728 **Pickering, I.J., Prince, R.C., George, M.J., Smith, R.D., George, G.N., and Salt, D.E.** (2000).  
729 Reduction and coordination of arsenic in Indian mustard. *Plant Physiol.* **122**: 1171–1177.
- 730 **Pickett, F.B., Wilson, A.K., and Estelle, M.** (1990). The aux1 mutation of Arabidopsis confers  
731 both Auxin and Ethylene resistance. *Plant Physiol.* **94**: 1462–1466.
- 732 **Rahman, A., Ahamed, A., Amakawa, T., Goto, N., and Tsurumi, S.** (2001). Chromosaponin I  
733 specifically interacts with AUX1 protein in regulating the gravitropic response of  
734 Arabidopsis roots. *Plant Physiol.* **125**: 990–1000.
- 735 **Rahman, A., Bannigan, A., Sulaman, W., Pechter, P., Blancaflor, E.B., and Baskin, T.I.**  
736 (2007). Auxin, actin and growth of the Arabidopsis thaliana primary root. *Plant J.* **50**: 514–  
737 528.
- 738 **Rahman, A., Takahashi, M., Shibasaki, K., Wu, S., Inaba, T., Tsurumi, S., and Baskin, T.I.**

- 739 (2010). Gravitropism of *Arabidopsis thaliana* Roots Requires the Polarization of PIN2  
740 toward the Root Tip in Meristematic Cortical Cells . *Plant Cell* **22**: 1762–1776.
- 741 **Rashotte, A.M., Brady, S.R., Reed, R.C., Ante, S.J., and Muday, G.K.** (2000). Basipetal  
742 auxin transport is required for gravitropism in roots of *Arabidopsis*. *Plant Physiol.* **122**:  
743 481–490.
- 744 **Rashotte, A.M., DeLong, A., and Muday, G.K.** (2001). Genetic and chemical reductions in  
745 protein phosphatase activity alter auxin transport, gravity response, and lateral root growth.  
746 *Plant Cell* **13**: 1683–1697.
- 747 **Ravenscroft, P., Brammer, H., and Richards, K.** (2009). Arsenic Pollution: A Global  
748 Synthesis. (Wiley-Blackwell).
- 749 **Retzer, K., Lacek, J., Skokan, R., Del Genio, C.I., Vosolsobě, S., Laňková, M., Malínská, K.,**  
750 **Konstantinova, N., Zažímalová, E., Napier, R.M., Petrášek, J., and Luschnig, C.** (2017).  
751 Evolutionary conserved cysteines function as cis-acting regulators of *Arabidopsis* PIN-  
752 FORMED 2 distribution. *Int. J. Mol. Sci.* **18**: 2274.
- 753 **Salt, D.E.** (2017). Would the real arsenate reductase please stand up? *New Phytol.* **215**: 926–928.
- 754 **Shen, S., Li, X.-F., Cullen, W.R., Weinfeld, M., and Le, X.C.** (2013). Arsenic Binding to  
755 Proteins. *Chem. Rev.* **113**: 7769–7792.
- 756 **Shibasaki, K., Uemura, M., Tsurumi, S., and Rahman, A.** (2009). Auxin Response in  
757 *Arabidopsis* under Cold Stress: Underlying Molecular Mechanisms. *Plant Cell* **21**: 3823–  
758 3838.
- 759 **Simon, S. et al.** (2016). PIN6 auxin transporter at endoplasmic reticulum and plasma membrane  
760 mediates auxin homeostasis and organogenesis in *Arabidopsis*. *New Phytol.* **211**: 65–74.
- 761 **Song, W.-Y., Yamaki, T., Yamaji, N., Ko, D., Jung, K.-H., Fujii-Kashino, M., An, G.,**  
762 **Martinoia, E., Lee, Y., and Ma, J.F.** (2014). A rice ABC transporter, OsABCC1, reduces  
763 arsenic accumulation in the grain. *Proc. Natl. Acad. Sci.* **111**: 15699–15704.
- 764 **Tamura, K., Stecher, G., Peterson, D., Filipowski, A., and Kumar, S.** (2013). MEGA6:

- 765 Molecular Evolutionary Genetics Analysis version 6.0. *Mol. Biol. Evol.* **30**: 2725–2729.
- 766 **Titapiwatanakun, B. et al.** (2009). ABCB19/PGP19 stabilises PIN1 in membrane  
767 microdomains in Arabidopsis. *Plant J.* **57**: 27–44.
- 768 **Wan, Y., Jasik, J., Wang, L., Hao, H., Volkmann, D., Menzel, D., Mancuso, S., Baluška, F.,**  
769 **and Lin, J.** (2012). The signal transducer NPH3 integrates the phototropin1 photosensor  
770 with PIN2-based polar auxin transport in Arabidopsis root phototropism. *Plant Cell* **24**:  
771 551–65.
- 772 **Wu, D., Shen, H., Yokawa, K., and Baluška, F.** (2015). Overexpressing OsPIN2 enhances  
773 aluminium internalization by elevating vesicular trafficking in rice root apex. *J. Exp. Bot.*  
774 **66**: 6791–6801.
- 775 **Wysocki, R., Clemens, S., Augustyniak, D., Golik, P., Maciaszczyk, E., Tamás, M.J., and**  
776 **Dziadkowiec, D.** (2003). Metalloid tolerance based on phytochelatins is not functionally  
777 equivalent to the arsenite transporter Acr3p. *Biochem. Biophys. Res. Commun.* **304**: 293–  
778 300.
- 779 **Xu, J. and Scheres, B.** (2005). Dissection of Arabidopsis ADP-RIBOSYLATION FACTOR 1  
780 function in epidermal cell polarity. *Plant Cell* **17**: 525–536.
- 781 **Xu, W., Dai, W., Yan, H., Li, S., Shen, H., Chen, Y., Xu, H., Sun, Y., He, Z., and Ma, M.**  
782 (2015). Arabidopsis NIP3;1 plays an important role in arsenic uptake and root-to-shoot  
783 translocation under arsenite stress conditions. *Mol. Plant.* **8**: 722–733.
- 784 **Yang, H. and Murphy, A.S.** (2009). Functional expression and characterization of Arabidopsis  
785 ABCB, AUX 1 and PIN auxin transporters in *Schizosaccharomyces pombe*. *Plant J.* **59**:  
786 179–191.
- 787 **Yang, H. C., Fu, H. L., Lin, Y. F. & Rosen, B. P.** (2012). Pathways of Arsenic Uptake and  
788 Efflux. *Curr. Top. Membr.* **69**: 325–358.
- 789 **Zazimalová, E., Murphy, A.S., Yang, H., Hoyerová, K., and Hosek, P.** (2010). Auxin  
790 transporters--why so many? *Cold Spring Harb. Perspect. Biol.* **2**: a001552.

791 **Figure Legends**

792 **Figure 1: Effect of arsenite on wild-type and mutants root elongation response.**

793 Five-day-old light grown wild-type or mutants seedlings were transferred to new agar plates  
794 supplemented with or without arsenite and incubated for various time lengths under continuous  
795 light.

796 **(A)** Time course of arsenite induced inhibition of root elongation in wild-type. **(B)** Dose response  
797 of arsenite for root elongation in wild-type after 3-day incubation. Approximately fifty percent  
798 inhibition of root growth was observed at 10  $\mu$ M arsenite.

799 **(C)** Representative images of root phenotype of wild-type, *pin* mutants and *pin2* complemented  
800 line after 10  $\mu$ M arsenite treatment for 3 days. Bar represents 0.5cm.

801 **(D)** *pin2/eir1-1* mutant shows hypersensitive response to arsenite induced root growth inhibition.  
802 Five-day-old Arabidopsis seedlings were subjected to arsenite treatment for 3 days. Compared  
803 with wild-type, *eir1-1* showed hypersensitive response to arsenite induced inhibition of root  
804 elongation at all concentrations we tested ( $P < 0.0001$ ), while complemented line of *pin2, eir1-4-*  
805 *35S:PIN2* show resistance to arsenite induced root growth inhibition at 10 and 15  $\mu$ M arsenite ( $P$   
806  $< 0.001$ ), as judged by Student's *t*-test.

807 For data shown in A, B and D vertical bars represent mean  $\pm$  S.E. of the experimental means  
808 from at least five independent experiments ( $n = 5$  or more), where experimental means were  
809 obtained from 8-10 seedlings per experiment.

810

811 **Figure 2: Arsenite inhibits root gravity, alters intracellular auxin response and inhibits**  
812 **auxin transport.**

813 **(A)** Effect of Arsenite on root gravity response. For assaying gravitropism, five –day-old light  
814 grown seedlings were transferred to arsenite, gravistimulated. Data for root tip orientation was  
815 collected for 2,4,6 and 8 h. Vertical bars represent mean  $\pm$  S.E. of the experimental means from  
816 at least five independent experiments ( $n = 5$  or more), where experimental means were obtained  
817 from 8-10 seedlings per experiment. Arsenite-induced inhibition of root gravity response was  
818 significant at all-time points as judged by Student's *t*-test ( $P < 0.0001$ ). **(B)** Effect of Arsenite on  
819 root elongation during the gravity assay. Arsenite-induced root growth inhibition was  
820 insignificant at all-time points as judged by Student's *t*-test. **(C)** Arsenite alters the intracellular  
821 auxin response. Five-day-old light grown *IAA2-GUS* seedlings were treated with 10  $\mu$ M Arsenite

822 for 1h and 2h respectively. After the Arsenite treatment, GUS staining was performed by  
823 incubating the seedlings in GUS staining buffer for 1h at 37°C. Demonstrated images are  
824 representative of 15-20 roots obtained from at least three independent experiments. Bar  
825 represents 100  $\mu\text{m}$ . **(D)** Quantification of GUS activity obtained from experiment C. Vertical  
826 bars represent mean  $\pm$  S.E. Compared with the control treatment, Arsenite-induced increase in  
827 GUS activity was highly significant ( $P < 0.0001$ ) in both time points as judged by Student's *t*-  
828 test. **(E)** Effect of arsenite on shootward auxin transport. Five-day-old light grown seedlings were  
829 transferred to new agar plates and subjected to arsenite treatment before transport of  $^3\text{H}$  IAA over  
830 2 h was measured as described in the methods. The experiments were conducted using at least  
831 three biological replicates. For each biological replicate, three technical replicates were assayed.  
832 (Col-control,  $n = 57$ ; Col- arsenite,  $n = 52$ ). Asterisks represent the statistical significance between  
833 treatment (\*\*\*  $P < 0.0001$ ). Vertical bars represent mean  $\pm$  S.E. of the experimental means.

834

### 835 **Figure 3. Arsenite specifically affects the intracellular dynamic cycling of PIN2.**

836 Five-day-old PIN2::PIN2-GFP, PIN1::PIN1-GFP and EGFP-LTI6b transgenic seedlings were  
837 treated with arsenite for 2h. After the incubation, seedlings were treated with 20  $\mu\text{M}$  BFA for 40  
838 min. The images were captured using same confocal setting and are representative of 15-20 roots  
839 obtained from at least 4 independent experiments.

840 **(A)** Effect of Arsenite on PIN2 trafficking. Bar represents 10  $\mu\text{m}$ . **(B)** Quantitative analysis of  
841 formation of PIN2-BFA body in the transition zone of PIN2::PIN2-GFP transgenic plants in  
842 presence or absence of Arsenite. Total number of BFA body and number of cells were counted in  
843 the imaged area. Bar graph represents the average number of BFA body formed per cell. Vertical  
844 bars represent mean  $\pm$  S.E. of the experimental means ( $n = 4$  or more). Asterisks represent the  
845 statistical significance between treatment (\*\*\*  $P < 0.0001$ ). **(C)** Effect of Arsenite on PIN1 and  
846 LTI6b trafficking. Note that BFA bodies are formed in presence of Arsenite. Bar represents 10  
847  $\mu\text{m}$ .

848

### 849 **Figure 4. *pin2/eir1-1* shows altered transport and accumulation of Arsenite.**

850 Allocation of  $^{74,73}\text{As}$  in Col-0 and *eir1-1* **(A)**. Five-day-old Col-0 and *eir1-1* roots were incubated  
851 in 0.1  $\mu\text{M}$  and 10  $\mu\text{M}$   $^{74,73}\text{As}$  for 2h.  $^{74,73}\text{As}$  radiation was captured by an imaging plate (IP).  
852 Images are representative of three independent experiments. **(B)** Quantification of As allocation

853 in root from experiment A. The data were obtained from three independent experiments with 10  
854 seedlings in each treatment. Vertical bars mean  $\pm$ SE. Asterisks represent the statistical  
855 significance between treatments as judged by Student's *t*-test: \*\*P < 0.001. (C) Scintillation  
856 counting <sup>74,73</sup>As activity in Col-0 and *eir1-1*. Five-day-old Col-0 and *eir1-1* seedlings were  
857 incubated for 2h at 0.1, 10 and 100  $\mu$ M <sup>74,73</sup>As. Whole root was collected after the incubation.  
858 <sup>74,73</sup>As activity was measured by liquid scintillation counting. The data were obtained from 10  
859 individual roots for each treatment. Vertical bars mean  $\pm$ SD. Asterisks represent the statistical  
860 significance between treatments as judged by Student's *t*-test: \*\*\*P < 0.0001.  
861 (D) Arsenic content in Col-0 and *eir1-1*. Five-day-old light grown Col-0 and *eir1-1* seedlings  
862 were transferred to 10 and 100  $\mu$ M arsenite solution and incubated for 2h. 5 mm root tip of 20  
863 seedlings for each treatment was used to measure As by ICP-MS. The data were obtained from  
864 three independent experiments. Vertical bars mean  $\pm$ SE. Asterisks represent the statistical  
865 significance between treatments as judged by Student's *t*-test: \*\*P < 0.001 and \*\*\*P < 0.0001.

866  
867 **Figure 5. As accumulation and distribution in roots of *Arabidopsis thaliana* exposed to 10**  
868  **$\mu$ M arsenite are influenced by PIN2. (A)** Combined XFI As and potassium (K) elemental  
869 distributions in whole *Arabidopsis* plants. As is denoted by red and potassium by green with  
870 brighter colors corresponding higher concentrations. As (and K) intensities are in a common  
871 scale for two specimens. The samples were scanned with 35  $\mu$ m step at the beamline 10-2  
872 (SSRL). Spatial scale bar represents 3.5 mm. (B) The images of roots shown in (A) are  
873 magnified by 1.4 times to show differences in the As distribution in the apical part in the root  
874 meristem in Col-0 and *eir1-1*. (C) The high resolution As XFI maps of the apical root meristem  
875 demonstrate higher accumulation of As in *eir1-1* mutant and less concentrated and more diffused  
876 distribution in Col-0. Arsenic intensity is in common scale for two specimens. Brighter colors  
877 correspond to higher concentrations. The circular markers denote spatial points that were  
878 selected for collection of As micro-XAS in roots. The samples were scanned with 2  $\mu$ m step at  
879 the beamline 2-3 (SSRL). (Spatial scale bar – 100  $\mu$ m). (D) Micro-XAS As-K near-edge spectra  
880 collected at the points of the apical root meristem in Col-0 and *eir1-1* roots as marked in (C). The  
881 spectra are normalized by intensity of the incident radiation but otherwise are not processed.  
882 Apart from *eir1-1* #7, micro-XAS As-K spectra in *eir1-1* are much more intense compared with  
883 Col-0. (E) Same near-edge XAS As-K spectra as in (D), collected in the root points shown in

884 (C), with background removed, normalized by the intensity of the incident radiation and the edge  
885 jump. All these spectra show a high similarity to As III - thiolated species, best represented by  
886 As(GS)<sub>3</sub> standard. (F) High resolution XFI As areal density distributions in hydrated root  
887 specimens of *Arabidopsis* collected at the beamline 2-ID-E (APS) with spatial resolution 1 μm x  
888 1 μm.

889  
890

891 **Table 1: Homology of plant auxin efflux carrier (PINs) and arsenite transporters**

|        | SsAcr3 | PvAcr3 | arsB   | OsLsi2 | AtPIN2 | AtPIN1 | AtPIN3 |
|--------|--------|--------|--------|--------|--------|--------|--------|
| SsAcr3 | 100.00 | 40.16  | 8.22   | 6.44   | 16.67  | 18.01  | 17.28  |
| PvAcr3 | 40.16  | 100.00 | 13.99  | 6.86   | 17.65  | 18.45  | 18.13  |
| arsB   | 8.22   | 13.99  | 100.00 | 12.15  | 24.51  | 24.44  | 24.86  |
| OsLsi2 | 6.44   | 6.86   | 12.15  | 100    | 10.26  | 9.63   | 8.83   |
| AtPIN2 | 16.67  | 17.65  | 24.51  | 10.26  | 100.00 | 62.88  | 60.88  |
| AtPIN1 | 18.01  | 18.45  | 24.44  | 9.63   | 62.88  | 100.00 | 65.49  |
| AtPIN3 | 17.28  | 18.13  | 24.86  | 8.83   | 60.88  | 65.49  | 100.00 |

892  
893  
894  
895  
896  
897  
898  
899

Identity matrix of *Saccharomyces cerevisiae* Acr3 (SsAcr3), *Pteris vittata* Acr3 (PvAcr3) and  
*Escherichia coli* arsenite transporter (arsB), *Oryza sativa* silicon transporter (OsLsi2), and  
*Arabidopsis thaliana* PINs (AtPIN1, AtPIN2, AtPIN3).



900

901 **Table 2: Areal densities (in ng/cm<sup>2</sup>) As, Fe, Zn, Ca.**

| element                               | As   |        | Fe   |        | Zn   |        | Ca    |        |
|---------------------------------------|------|--------|------|--------|------|--------|-------|--------|
|                                       | mean | Median | mean | median | mean | median | Mean  | median |
| <b>Col-0 + 10 μM arsenite</b>         |      |        |      |        |      |        |       |        |
| Z1                                    | 1750 | 1163   | 1197 | 885    | 489  | 517    | 13418 | 13894  |
| Z2                                    | 1068 | 730    | 873  | 720    | 543  | 565    | 13142 | 13660  |
| <b>Col-0 + 10 μM arsenite</b>         |      |        |      |        |      |        |       |        |
| Z1                                    | 856  | 835    | 1424 | 1394   | 665  | 655    | 12215 | 11679  |
| Z2                                    | 535  | 483    | 1269 | 1272   | 638  | 642    | 9882  | 9716   |
| <b>Col-0 + 10 μM arsenite</b>         |      |        |      |        |      |        |       |        |
| Z1                                    | 1208 | 1134   | 634  | 621    | 509  | 505    | 10640 | 10047  |
| Z2                                    | 940  | 838    | 672  | 654    | 678  | 691    | 13091 | 12782  |
| <b><i>eir1-1</i> + 10 μM arsenite</b> |      |        |      |        |      |        |       |        |
| Z1                                    | 5252 | 5354   | 1714 | 1539   | 815  | 845    | 11291 | 11078  |
| Z2                                    | 4927 | 4730   | 892  | 638    | 1199 | 1200   | 12693 | 12593  |
| <b><i>eir1-1</i> + 10 μM arsenite</b> |      |        |      |        |      |        |       |        |
| Z1                                    | 3093 | 2953   | 901  | 836    | 619  | 602    | 11090 | 11705  |
| Z2                                    | 3460 | 3368   | 986  | 899    | 587  | 552    | 10843 | 10861  |
| <b>Col -control</b>                   |      |        |      |        |      |        |       |        |
| Z1                                    | 7    | 0      | 1272 | 1161   | 504  | 501    | 11925 | 11730  |
| Z2                                    | 7    | 1      | 1331 | 1274   | 775  | 737    | 18797 | 18409  |
| <b><i>eir1-1</i> control</b>          |      |        |      |        |      |        |       |        |
| Z1                                    | 6    | 0      | 1189 | 971    | 265  | 223    | 7701  | 6545   |
| Z2                                    | 4    | 0      | 764  | 640    | 219  | 187    | 4609  | 3800   |

902

903 The areal density was calculated from the elemental maps obtained from 2-ID-E images of col-0  
 904 and *eir1-1* in presence or absence of 10 μM arsenite.

905 Z1 – denotes the root apical meristem.

906 Z2- denotes the transition zone.

907

908

909

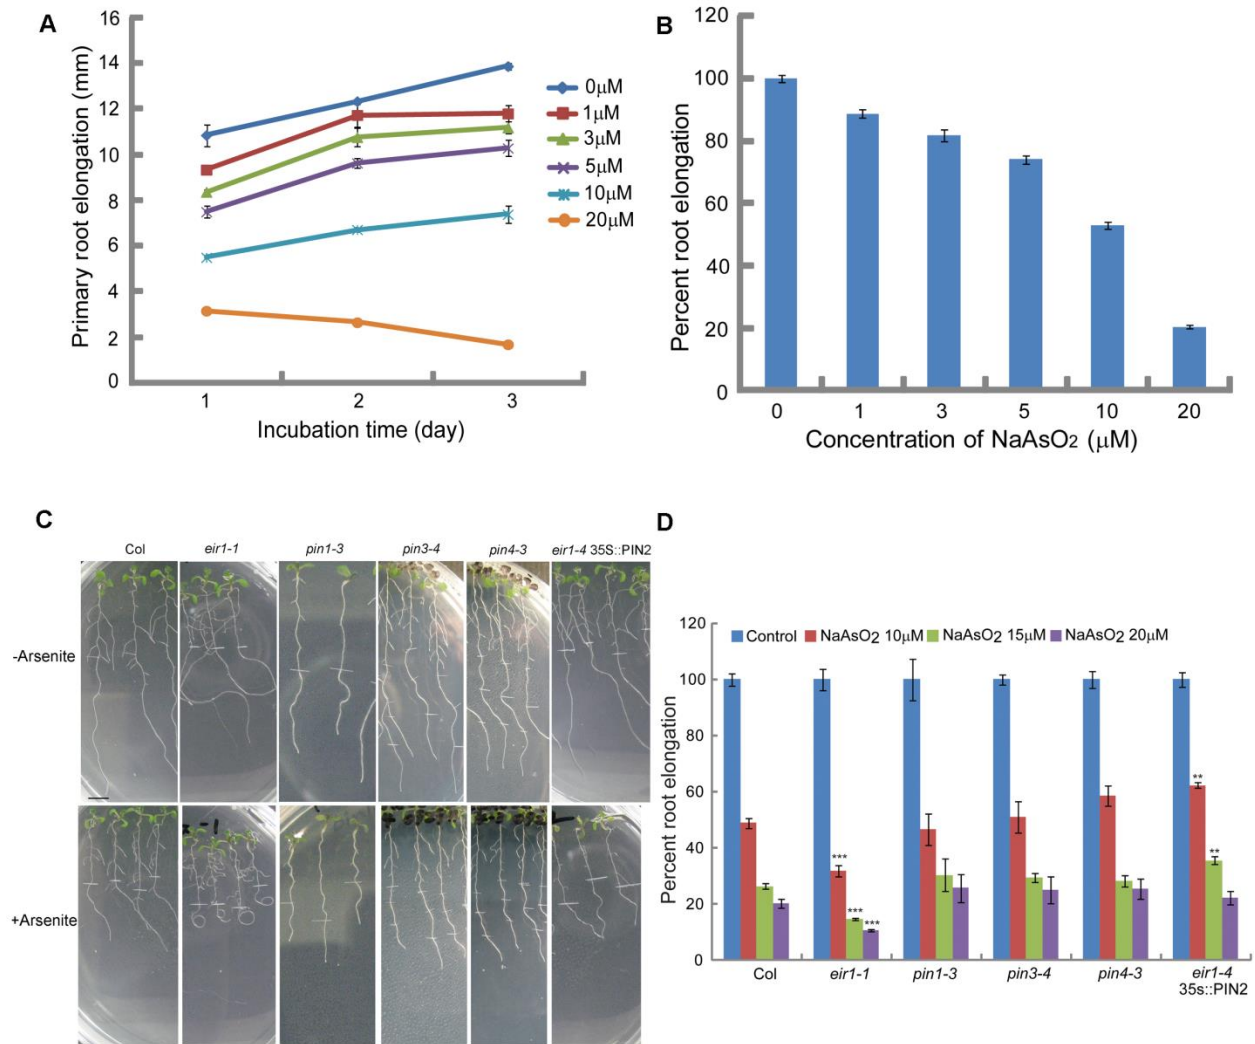

910

911 **Figure 1: Effect of arsenite on wild-type and mutants root elongation response.**

912 Five-day-old light grown wild-type or mutants seedlings were transferred to new agar plates  
 913 supplemented with or without arsenite and incubated for various time lengths under continuous  
 914 light.

915 **(A)** Time course of arsenite induced inhibition of root elongation in wild-type. **(B)** Dose response  
 916 of arsenite for root elongation in wild-type after 3-day incubation. Approximately fifty percent  
 917 inhibition of root growth was observed at 10 μM arsenite.

918 **(C)** Representative images of root phenotype of wild-type, *pin* mutants and *pin2* complemented  
 919 line after 10 μM arsenite treatment for 3 days. Bar represents 0.5cm.

920 **(D)** *pin2/eir1-1* mutant shows hypersensitive response to arsenite induced root growth inhibition.  
921 Five-day-old Arabidopsis seedlings were subjected to arsenite treatment for 3 days. Compared  
922 with wild-type, *eir1-1* showed hypersensitive response to arsenite induced inhibition of root  
923 elongation at all concentrations we tested ( $P < 0.0001$ ), while complemented line of *pin2, eir1-4-*  
924 *35S:PIN2* show resistance to arsenite induced root growth inhibition at 10 and 15  $\mu\text{M}$  arsenite ( $P$   
925  $< 0.001$ ), as judged by Student's *t*-test.

926 For data shown in A, B and D vertical bars represent mean  $\pm$  S.E. of the experimental means  
927 from at least five independent experiments ( $n = 5$  or more), where experimental means were  
928 obtained from 8-10 seedlings per experiment.

929

930

931

932

933

934

935

936

937

938

939

940

941

942

943

944

945

946

947

948

949

950

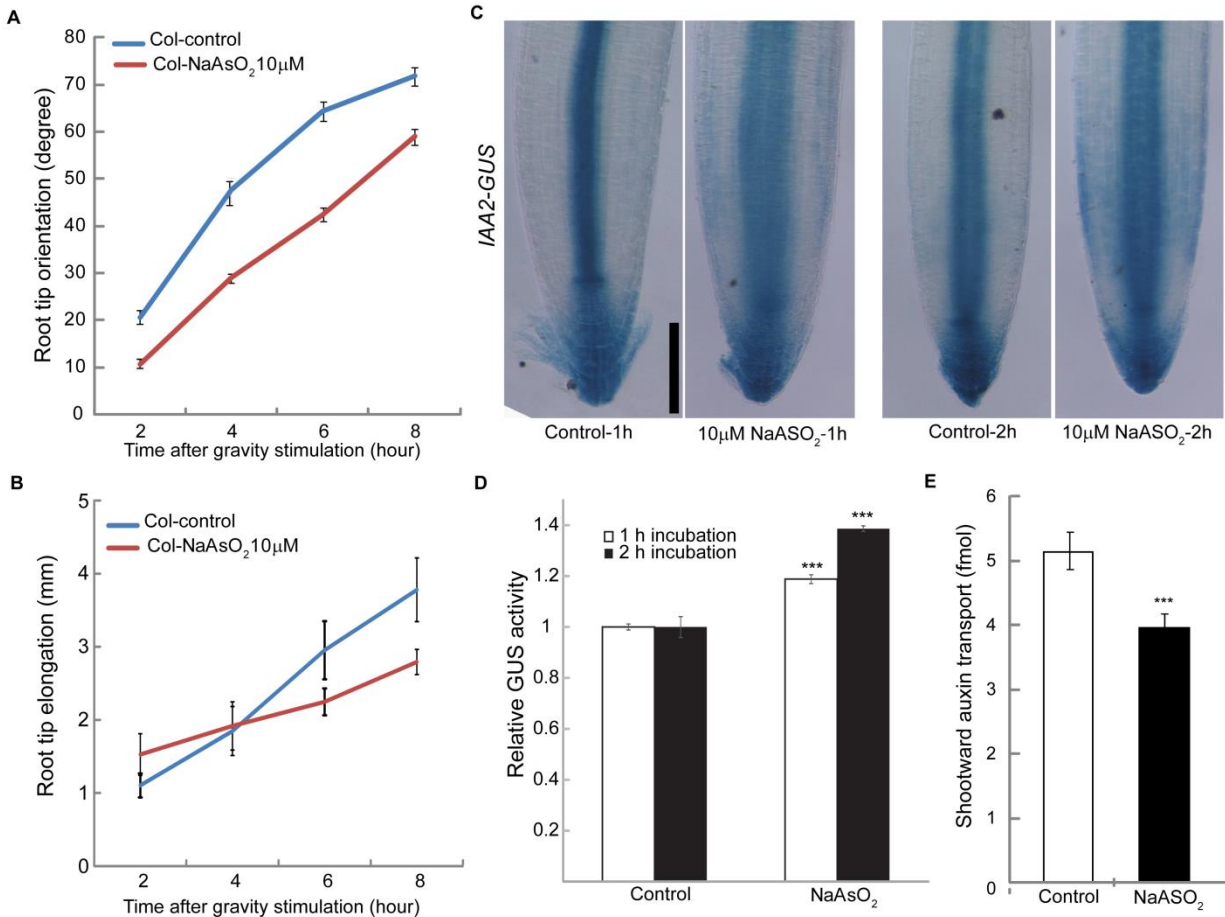

951

952 **Figure 2: Arsenite inhibits root gravity, alters intracellular auxin response and inhibits**  
953 **auxin transport.**

954 **(A)** Effect of Arsenite on root gravity response. For assaying gravitropism, five -day-old light  
955 grown seedlings were transferred to arsenite, gravistimulated. Data for root tip orientation was  
956 collected for 2,4,6 and 8 h. Vertical bars represent mean  $\pm$  S.E. of the experimental means from  
957 at least five independent experiments ( $n = 5$  or more), where experimental means were obtained  
958 from 8-10 seedlings per experiment. Arsenite-induced inhibition of root gravity response was  
959 significant at all-time points as judged by Student's  $t$ -test ( $P < 0.0001$ ). **(B)** Effect of Arsenite on  
960 root elongation during the gravity assay. Arsenite-induced root growth inhibition was  
961 insignificant at all-time points as judged by Student's  $t$ -test. **(C)** Arsenite alters the intracellular  
962 auxin response. Five-day-old light grown *IAA2-GUS* seedlings were treated with 10  $\mu$ M Arsenite  
963 for 1h and 2h respectively. After the Arsenite treatment, GUS staining was performed by  
964 incubating the seedlings in GUS staining buffer for 1h at 37°C. Demonstrated images are

965 representative of 15-20 roots obtained from at least three independent experiments. Bar  
966 represents 100  $\mu\text{m}$ . **(D)** Quantification of GUS activity obtained from experiment C. Vertical  
967 bars represent mean  $\pm$  S.E. Compared with the control treatment, Arsenite-induced increase in  
968 GUS activity was highly significant ( $P < 0.0001$ ) in both time points as judged by Student's *t*-  
969 test. **(E)** Effect of arsenite on shootward auxin transport. Five-day-old light grown seedlings were  
970 transferred to new agar plates and subjected to arsenite treatment before transport of  $^3\text{H}$  IAA over  
971 2 h was measured as described in the methods. The experiments were conducted using at least  
972 three biological replicates. For each biological replicate, three technical replicates were assayed.  
973 (Col-control,  $n= 57$ ; Col- arsenite,  $n=52$ ). Asterisks represent the statistical significance between  
974 treatment ( \*\*\*  $P < 0.0001$ ). Vertical bars represent mean  $\pm$  S.E. of the experimental means.

975

976

977

978

979

980

981

982

983

984

985

986

987

988

989

990

991

992

993

994

995

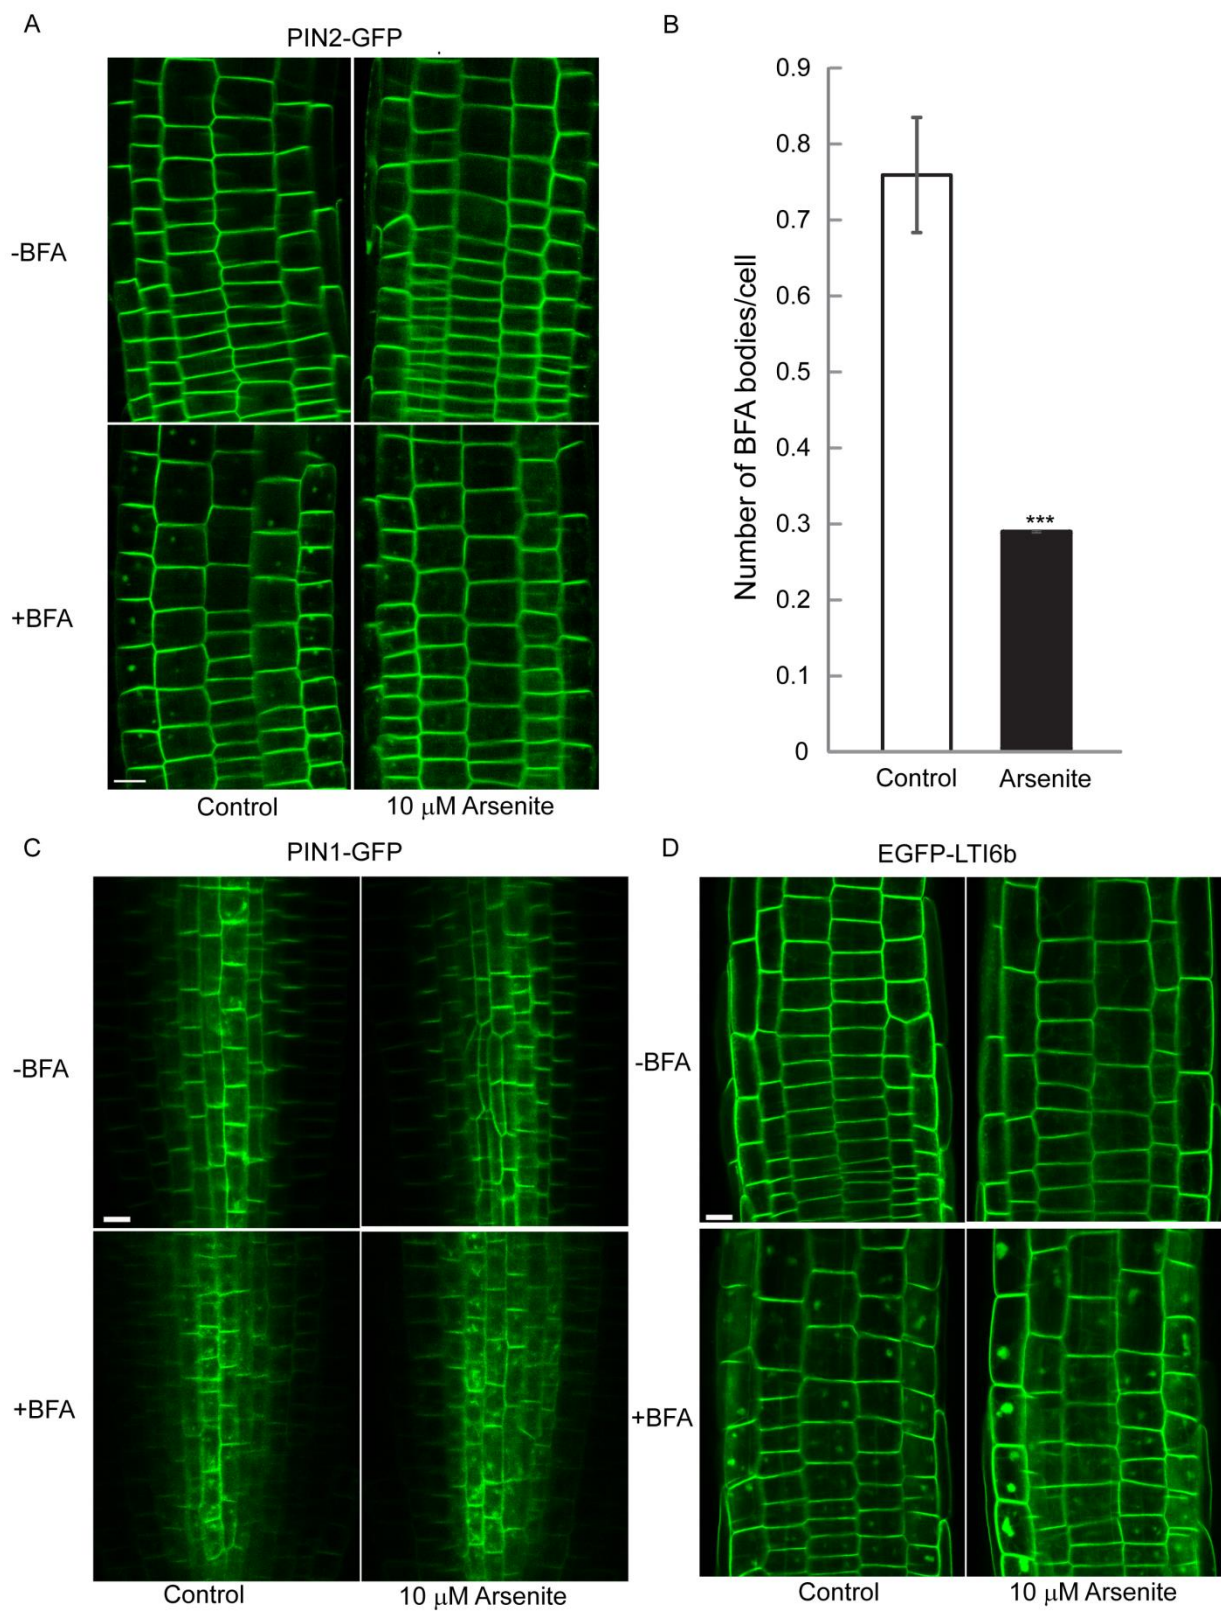

996

997

998 **Figure 3. Arsenite specifically affects the intracellular dynamic cycling of PIN2.**

999 Five-day-old PIN2::PIN2-GFP, PIN1::PIN1-GFP and EGFP-LTI6b transgenic seedlings were  
1000 treated with arsenite for 2h. After the incubation, seedlings were treated with 20  $\mu$ M BFA for 40  
1001 min. The images were captured using same confocal setting and are representative of 15-20 roots  
1002 obtained from at least 4 independent experiments.

1003 **(A)** Effect of Arsenite on PIN2 trafficking. Bar represents 10  $\mu$ m. **(B)** Quantitative analysis of  
1004 formation of PIN2-BFA body in the transition zone of PIN2::PIN2-GFP transgenic plants in  
1005 presence or absence of Arsenite. Total number of BFA body and number of cells were counted in  
1006 the imaged area. Bar graph represents the average number of BFA body formed per cell. Vertical  
1007 bars represent mean  $\pm$  S.E. of the experimental means ( $n = 4$  or more). Asterisks represent the  
1008 statistical significance between treatment (\*\*\*  $P < 0.0001$ ). **(C)** Effect of Arsenite on PIN1 and  
1009 LTI6b trafficking. Note that BFA bodies are formed in presence of Arsenite. Bar represents 10  
1010  $\mu$ m.

1011

1012

1013

1014

1015

1016

1017

1018

1019

1020

1021

1022

1023

1024

1025

1026

1027

1028

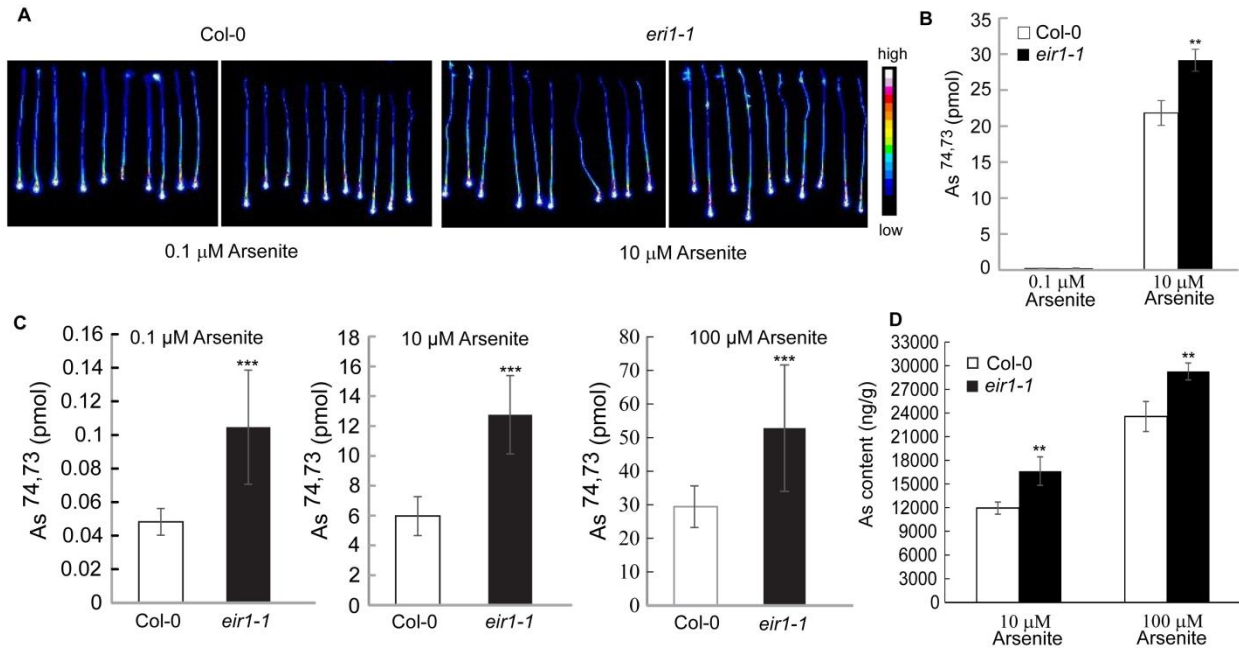

1029

1030 **Figure 4. *pin2/eir1-1* shows altered transport and accumulation of Arsenite.**

1031 Allocation of  $^{74,73}\text{As}$  in Col-0 and *eir1-1* (A). Five-day-old Col-0 and *eir1-1* roots were incubated  
 1032 in 0.1 μM and 10 μM  $^{74,73}\text{As}$  for 2h.  $^{74,73}\text{As}$  radiation was captured by an imaging plate (IP).  
 1033 Images are representative of three independent experiments. (B) Quantification of As allocation  
 1034 in root from experiment A. The data were obtained from three independent experiments with 10  
 1035 seedlings in each treatment. Vertical bars mean ±SE. Asterisks represent the statistical  
 1036 significance between treatments as judged by Student's *t*-test: \*\*P < 0.001. (C) Scintillation  
 1037 counting  $^{74,73}\text{As}$  activity in Col-0 and *eir1-1*. Five-day-old Col-0 and *eir1-1* seedlings were  
 1038 incubated for 2h at 0.1, 10 and 100 μM  $^{74,73}\text{As}$ . Whole root was collected after the incubation.  
 1039  $^{74,73}\text{As}$  activity was measured by liquid scintillation counting. The data were obtained from 10  
 1040 individual roots for each treatment. Vertical bars mean ±SD. Asterisks represent the statistical  
 1041 significance between treatments as judged by Student's *t*-test: \*\*\*P < 0.0001.

1042 (D) Arsenic content in Col-0 and *eir1-1*. Five-day-old light grown Col-0 and *eir1-1* seedlings  
 1043 were transferred to 10 and 100 μM arsenite solution and incubated for 2h. 5 mm root tip of 20  
 1044 seedlings for each treatment was used to measure As by ICP-MS. The data were obtained from  
 1045 three independent experiments. Vertical bars mean ±SE. Asterisks represent the statistical  
 1046 significance between treatments as judged by Student's *t*-test: \*\*P < 0.001 and \*\*\*P < 0.0001.

1047



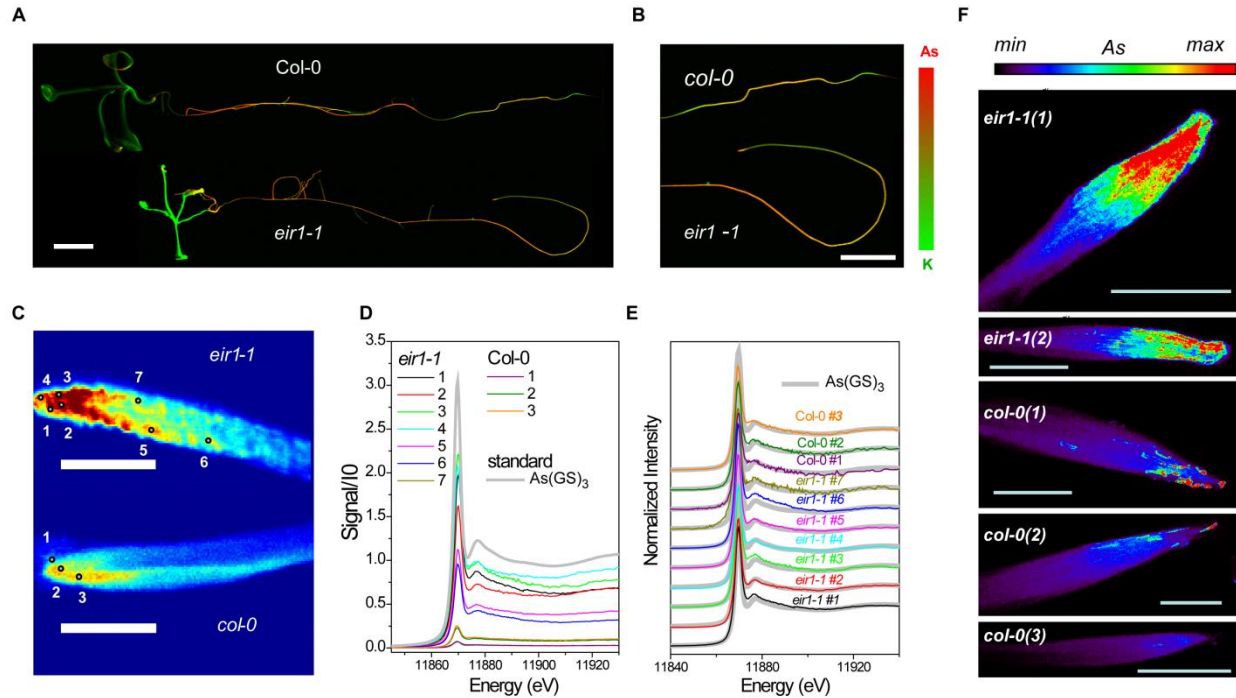

1048

1049 **Figure 5. As accumulation and distribution in roots of *Arabidopsis thaliana* exposed to 10**  
1050  **$\mu$ M arsenite are influenced by PIN2. (A) Combined XFI As and potassium (K) elemental**  
1051 **distributions in whole *Arabidopsis* plants. As is denoted by red and potassium by green with**  
1052 **brighter colors corresponding higher concentrations. As (and K) intensities are in a common**  
1053 **scale for two specimens. The samples were scanned with 35  $\mu$ m step at the beamline 10-2**  
1054 **(SSRL). Spatial scale bar represents 3.5 mm. (B) The images of roots shown in (A) are**  
1055 **magnified by 1.4 times to show differences in the As distribution in the apical part in the**  
1056 **meristem in Col-0 and *eir1-1*. (C) The high resolution As XFI maps of the apical root meristem**  
1057 **demonstrate higher accumulation of As in *eir1-1* mutant and less concentrated and more diffused**  
1058 **distribution in Col-0. Arsenic intensity is in common scale for two specimens. Brighter colors**  
1059 **correspond to higher concentrations. The circular markers denote spatial points that were**  
1060 **selected for collection of As micro-XAS in roots. The samples were scanned with 2  $\mu$ m step at**  
1061 **the beamline 2-3 (SSRL). (Spatial scale bar – 100  $\mu$ m). (D) Micro-XAS As-K near-edge spectra**  
1062 **collected at the points of the apical root meristem in Col-0 and *eir1-1* roots as marked in (C). The**  
1063 **spectra are normalized by intensity of the incident radiation but otherwise are not processed.**  
1064 **Apart from *eir1-1* #7, micro-XAS As-K spectra in *eir1-1* are much more intense compared with**  
1065 **Col-0. (E) Same near-edge XAS As-K spectra as in (D), collected in the root points shown in**

1066 (C), with background removed, normalized by the intensity of the incident radiation and the edge  
1067 jump. All these spectra show a high similarity to As III - thiolated species, best represented by  
1068 As(GS)<sub>3</sub> standard. (F) High resolution XFI As areal density distributions in hydrated root  
1069 specimens of Arabidopsis collected at the beamline 2-ID-E (APS) with spatial resolution 1 μm x  
1070 1 μm.  
1071  
1072
